# Supplementary material for: Experience of living with cancer and comorbid illness: protocol for a qualitative systematic review
Source: PubMed Central journal article supplement — BMJ Open. 2017 May 9;7(5):e013383. doi: 10.1136/bmjopen-2016-013383 (PMC5623351; doi:10.1136/bmjopen-2016-013383), 2017-05-09
Supplement: bmjopen-2016-013383.draft_revisions.pdf [file bmjopen-2016-013383.draft_revisions.pdf]

# BMJ Open

## Experience of living with cancer and comorbid illness: a qualitative systematic review of 'cancer plus'

|                                 |                                                                                                                                                                                                                                                                                                                                                                                                                        |
|---------------------------------|------------------------------------------------------------------------------------------------------------------------------------------------------------------------------------------------------------------------------------------------------------------------------------------------------------------------------------------------------------------------------------------------------------------------|
| Journal:                        | <i>BMJ Open</i>                                                                                                                                                                                                                                                                                                                                                                                                        |
| Manuscript ID                   | bmjopen-2016-013383                                                                                                                                                                                                                                                                                                                                                                                                    |
| Article Type:                   | Protocol                                                                                                                                                                                                                                                                                                                                                                                                               |
| Date Submitted by the Author:   | 12-Jul-2016                                                                                                                                                                                                                                                                                                                                                                                                            |
| Complete List of Authors:       | Cavers, Debbie; University of Edinburgh, Centre for Population Health Sciences<br>CunninghamBurley, Sarah; University of Edinburgh, Public Health Sciences<br>Watson, Eila; Oxford Brookes University Faculty of Health and Life Sciences<br>Banks, Elspeth; NCRI Psychosocial Oncology and Survivorship Clinical Studies Group<br>Campbell, Christine; University of Edinburgh, Centre for Population Health Sciences |
| <b>Primary Subject Heading</b>: | Oncology                                                                                                                                                                                                                                                                                                                                                                                                               |
| Secondary Subject Heading:      | Qualitative research, Health services research, Patient-centred medicine, Sociology                                                                                                                                                                                                                                                                                                                                    |
| Keywords:                       | Cancer, Systematic review, Multimorbidity, Comorbidity, Qualitative synthesis                                                                                                                                                                                                                                                                                                                                          |
|                                 |                                                                                                                                                                                                                                                                                                                                                                                                                        |

SCHOLARONE™  
Manuscripts

Only

1  
2  
3 **Experience of living with cancer and comorbid illness: a qualitative systematic review of 'cancer plus'**  
4  
5  
6  
7  
8  
9

10 Debbie Cavers, Sarah Cunningham-Burley, Eila Watson, Elspeth Banks, Christine Campbell  
11

12  
13  
14  
15 Author affiliations:  
16

17  
18 Debbie Cavers, CSO Research Fellow, University of Edinburgh, The Usher Institute of Population Health  
19  
20 Sciences and Informatics, Centre for Population Health Sciences, Medical School, Teviot Place, Edinburgh  
21  
22 EH8 9AG, UK.  
23

24 Sarah Cunningham-Burley, Professor of Medical and Family Sociology, University of Edinburgh, The Usher  
25  
26 Institute of Population Health Sciences and Informatics, Centre for Population Health Sciences, Medical  
27  
28 School, Teviot Place, Edinburgh EH8 9AG, UK.  
29

30 Eila Watson, Professor in Supportive Cancer Care, Oxford Brookes University, Faculty of Health and Life  
31  
32 Sciences, Jack Straws Lane, Marston, Oxford, OX3 0FL.  
33

34  
35 Elspeth Banks, Consumer Member, NCRI Psychosocial Oncology and Survivorship Clinical Studies Group,  
36  
37 Willowbank, Mill Road, Morningside, Wishaw, Lanarkshire, ML2 9QR.  
38

39 Christine Campbell, Senior Research Fellow, University of Edinburgh, The Usher Institute of Population  
40  
41 Health Sciences and Informatics, Centre for Population Health Sciences, Medical School, Teviot Place,  
42  
43 Edinburgh EH8 9AG, UK.  
44

45  
46  
47  
48 Correspondence to:  
49

50  
51 Dr Debbie Cavers, [Debbie.Cavers@ed.ac.uk](mailto:Debbie.Cavers@ed.ac.uk)  
52  
53  
54  
55  
56  
57  
58  
59  
60

**ABSTRACT**

Introduction: There are an increasing number of people living with and beyond cancer, whose experience is further complicated by additional long term health conditions in the context of an ageing population. The supportive care needs of this growing patient group should be recognised and addressed. There is a need to explore the experience of living with cancer and comorbid illness in order to develop optimal models of patient-centred care. This protocol describes a systematic review which aims to identify the evidence relating to the experience of 'cancer plus' for patients, informal carers and professionals, and to highlight areas where more research is needed.

Methods and Analysis: A systematic review following PRISMA guidance will be undertaken. Databases Medline, Embase, CINAHL, PsycINFO, ASSIA, Sociological Abstracts, Web of Science, SCOPUS, OpenGrey and ProQuest Dissertations and Theses Global will be systematically searched for articles relevant to patient, carer and professional experiences of 'cancer plus'. Two independent reviewers will screen articles for inclusion and evaluate them according to the Critical Appraisal Skills Programme (CASP) tool. A meta-ethnographic approach will be adopted to synthesise the qualitative evidence to offer new theoretical insights into the topic area and for a patient-centred model of care.

Ethics and dissemination: The review does not require formal ethical review as no direct patient contact or patient identifiable data is used. Conduct of the review has been approved internally by the University of Edinburgh Centre for Population Health Sciences Ethics Review Committee. Results of the review will be published in a generalist peer-reviewed journal and presented at a relevant conference in addition to informing subsequent empirical work by the authors on this topic area.

**Strengths and limitations of this study:**

- Protocol for a systematic review of current literature exploring a highly important topic presenting a current challenge to health care provision
- Using robust methodology following standardised guidelines
- Scope to inform policy and practice and improve patient care
- Systematic review of qualitative empirical evidence only; does not cover quantitative studies or existing systematic reviews but can give important theoretical insights.
- Large evidence base for experience of cancer and experience of multi-morbidity, but little linking the two bodies of evidence, presenting a challenge to the reviewers.

## INTRODUCTION

Due to the ageing population and better treatments, there are an increasing number of people living with and beyond cancer (1). The lived experience, and health and social care needs of these individuals are often complicated by the presence of other comorbid chronic illnesses; as many as 78% of cancer patients are living with at least one other condition, the prevalence of which also increase with age (2, 3). Therefore, the support needs of people living with multiple complex conditions are enduring and need to be identified and addressed (4). There is increasing recognition of the role of primary care in the provision of ongoing support to patients particularly after the completion of hospital-based treatment as patients adjust to life post treatment, dealing with ongoing medical issues related to their cancer treatment or other chronic illness (5, 6). This picture becomes more complex when other long term conditions are also being managed, with implications for the coordination of quality care (7) and self-management (8).

Meeting the needs of people living beyond cancer has been identified as a policy priority (9), which informed the development of the National Survivorship Initiative (5) in England and Wales; survivorship also forms part of the remit for Scotland's Better Cancer Care (10). In many cases survivorship initiatives and research target the clinical needs related to long term side effects (11). However, psychosocial support for survivors of cancer is another important consideration and has implications for the role of primary and community care. While valuable research has been conducted to understand better these dimensions of life for the patient, and their relatives, in addition to the role of and impact on primary care e.g. (12-16), less is known about the impact of additional chronic illness on patients' lived experience. As such, service development and provision would benefit from further in-depth research in this area (6, 17). Understanding the challenges to identity and experiences of people living after a cancer diagnosis with other chronic conditions such as COPD, diabetes or mental ill health, can give new insights into patient-centred models of care; with scope to explore the concept of 'survivorship' in this context.

## Objectives

While the holistic needs of cancer survivors form part of the vision of survivorship initiatives, and there is a growing body of work exploring experience of multi-morbidity (8), there is a dearth of research linking cancer with comorbid disease to further enrich our understanding of living with 'cancer plus'. This systematic review aims to synthesise and report on published evidence exploring the experience of cancer survivorship in connection with that of other long term conditions, in particular looking at issues of psycho-social support needs, identity, quality of life, accessing services and quality of care. The findings from the review will iteratively combine with an ongoing patient-centred research prioritisation exercise to map out an empirical research agenda exploring the experience of living with cancer and comorbid illness.

### Research questions:

- What are the findings of qualitative evidence exploring the *experience* of living with both cancer and one or more co-morbidities, including personal identity/identities?
- What evidence is there for informal carer and professional perspectives in supporting people with cancer and one or more co-morbidities?
- What are the psychosocial support needs of people living with cancer and other long term condition(s) identified in the literature?
- What are people's experiences of services and quality and coordination of care reported in the literature?
- What research priorities can be derived from the available evidence?

## REVIEW METHODS

### Design

A systematic review of the current evidence linking experience of cancer with comorbid illness is considered a robust way of identifying and synthesising the published evidence in this area to define a cohesive empirical research agenda that builds on prior knowledge (18). The review will include qualitative evidence

1  
2  
3 only since the focus is on lived experience and because of the exploratory nature of the topic. It is based on  
4  
5 the PRISMA statement guidance for conducting a systematic review (19), and the protocol follows the  
6  
7 relevant items on the PRISMA-P checklist (20). The review protocol has been registered on the International  
8  
9 Prospective Register of Systematic Reviews (PROSPERO) database (registration number: CRD42016041796).

10  
11  
12 The review will use methods of qualitative synthesis to combine, integrate and interpret the evidence from  
13  
14 the included papers (see eligibility and data synthesis sections below) (21, 22). The review aims to move  
15  
16 beyond the aggregation of available data to a higher level of interpretation in order to inform the current  
17  
18 theory around living with complex illness and define where further research can add to what is known (21).

19  
20  
21 No formal ethical approval is required for this study as it will not include patient identifiable data. It has been  
22  
23 internally approved by the University of Edinburgh Centre for Population Health Sciences Ethics Review  
24  
25 Committee (Ref: 8/03/2016).

### 26 27 28 *Eligibility criteria*

29  
30 The review will include qualitative empirical studies, including unpublished grey literature. As above,  
31  
32 quantitative studies will not be included as the review seeks in-depth data exploring lived experiences.  
33  
34 However, qualitative data from mixed methods studies will be screened for inclusion and included if the  
35  
36 qualitative component is relevant. Included articles will be published between 2000 and the present day to  
37  
38 ensure the currency of the work while enabling a broad view of developing issues to be identified. Articles  
39  
40 will be included that address the lived experience of the cancer journey with attention to existing long term  
41  
42 health conditions, and will identify issues related to psychosocial and supportive care as outlined in relation  
43  
44 to the anticipated dimensions of interest. Articles will be included from across the cancer continuum from  
45  
46 diagnosis through to end of life and will include the perspectives of adult patients (aged 18 or over), informal  
47  
48 carers and health care professionals. No language restriction will be imposed and translations will be sought  
49  
50 for non-English articles.  
51  
52

53  
54  
55 Studies will be included for any cancer type in combination with one or more comorbid long term condition  
56  
57 (LTC), also described as cancer multi-morbidity or 'cancer plus'. Long term conditions to be included will be  
58  
59  
60

1  
2  
3 guided by, but not exclusively limited to, those listed in Barnett et al's paper mapping the epidemiology of  
4 multi-morbidity (3) (See Appendix 1 for a full list of conditions). The applied definition of long term  
5 conditions is based on ISD Scotland's report on important long term conditions in Scotland; the report uses,  
6 among others, the Long Term Conditions Collaborative to define an LTC as, 'one that requires ongoing care,  
7 limits what one can do and is likely to last longer than a year'(23). Long term side effects of cancer treatment  
8 and second primary cancers are not included; experience of second primary cancers is being addressed  
9 separately within the research centre. As an exploratory review, a low threshold will be adopted for included  
10 conditions as perceived by the individual, but there will be a focus on those that, alongside effects from the  
11 cancer and its treatment, are most prevalent and have the greatest impact on individuals' lives (24).  
12  
13  
14  
15  
16  
17  
18  
19  
20  
21

### 22 *Dimensions of interest*

23  
24 The topics covered are expected to include quality of life, experiences of and access to services, supportive  
25 care needs, attitude and identity, continuity and perceived quality of care, influence of personal  
26 demographics (age, gender, ethnicity, socio-economic status), coordination of care for multiple conditions  
27 and experiences of palliative care. However, the outcomes will depend on the evidence available and gaps in  
28 the evidence will be highlighted for future study.  
29  
30  
31  
32  
33  
34  
35

### 36 *Information sources*

37  
38 A variety of information sources will be examined to identify potential literature for the review. This will  
39 primarily involve a literature database search (including grey literature), but will also include citation and  
40 snowball searching, known expert consultation via email, related articles searches in PubMed and use of  
41 Google scholar. The databases to be consulted are: Medline, Embase, CINAHL, PsycINFO, ASSIA, Sociological  
42 Abstracts, Web of Science, SCOPUS and, for grey literature, OpenGrey and ProQuest Dissertations and  
43 Theses Global. These are considered sufficient to comprehensively cover the range of topics and disciplines  
44 implicated in this review.  
45  
46  
47  
48  
49  
50  
51  
52  
53  
54  
55  
56  
57  
58  
59  
60



### Search strategy

The searching phase aims to produce a sampling frame from which relevant papers can be selected. The process of searching to be undertaken will begin with individually searching each of the listed databases using an adapted list of search terms; the developed search strategy for Medline is shown in Box 1. The search terms will be adapted to suit each database to derive the most meaningful search and will use free text, MeSH and subject headings for maximum sensitivity and specificity.

#### Box 1: Example search strategy for Medline

1. Comorbidity/
2. (Multimorbid\$ or multi-morbid\$ or Co-morbid\$).mp. [mp=title, abstract, original title, name of substance word, subject heading word, keyword heading word, protocol supplementary concept word, rare disease supplementary concept word, unique identifier]
3. Chronic Disease/ or (Chronic adj5 (illness\$ or condition\$ or disease)).tw.
4. (Long term adj5 (condition\$ or illness\$ or disease\$)).mp. [mp=title, abstract, original title, name of substance word, subject heading word, keyword heading word, protocol supplementary concept word, rare disease supplementary concept word, unique identifier]
5. 1 or 2 or 3 or 4
6. Neoplasms/ or Cancer.mp or (Tumour or tumor or Oncology or Neoplasm).mp. [mp=title, abstract, original title, name of substance word, subject heading word, keyword heading word, protocol supplementary concept word, rare disease supplementary concept word, unique identifier]
7. Qualitative Research/ or Qualitative.mp or Interview/ r Interview\$.mp or In-depth.mp
8. (Focus Group or Survey or Questionnaire\$ or Ethnograph\$ or Observation\$ or Participant\$ or Respondent\$ or View\$ or Belief\$ or Attitude\$ or Awareness or Perspective\$ or Understanding\$ or Findings or Grounded Theory or Social Construction\$ or Theoretical or Phenomenolog\$).mp. [mp=title, abstract, original title, name of substance word, subject heading word, keyword heading word, protocol supplementary concept word, rare disease supplementary concept word, unique identifier]
9. 7 or 8
10. Psychosocial.mp. or Stress, Psychological/ or Social Support/ or Psycho-social.mp or "Quality of Life"/ or "Experience of Illness".mp or Experience adj5 Illness or Attitude to Health/ or "Quality of Life".mp or Happ\$.mp or Emotion\$.mp. or Emotions/
11. Patient satisfaction.mp. or Patient Satisfaction/ or "Quality of Health Care"/ or "Patient Experience".mp or Satisfaction.mp or "Information Preferences".mp or Decision Making/ or (Decision-making or Decision Making).mp or (Informed choice or Informed Decision Making).mp or Self management.mp. or Self Care/ or "Continuity of Patient Care"/ or Integrated care.mp
12. Access to Health Care.mp. or Health Services Accessibility/
13. Identity.mp. or gender.mp. or Gender Identity/
14. (Health behaviour or Health behavior).mp.
15. (Help-seeking or Help seeking).mp.
16. (Well-being or Well being).mp. or Holistic.mp or Continuity of Care.mp or "Continuity of Patient Care"/ or (Fragmented adj5 care).mp or (joined-up or Joined Up).mp or Integrated care.mp or Diversity of Care.mp.
17. Primary care.mp. or Primary Health Care/ or Secondary care.mp. or Secondary Care/ or Community Care.mp or Community Health Services/ or Ambulatory Care.mp. or Ambulatory Care/ or "Delivery of Health Care, Integrated"/ or Preventive Health Services/ or Family Practice/ or Shared care.mp or Collaborat\$ care.mp

18. (Patient-centred care or Patient centred care or Patient-centred or Person-centred or Patient centred or Person centred).mp or Patient-Centered Care/

19. Palliative Care/ or Supportive care.mp. or palliative.mp.

20. "Health Services Needs and Demand"/ or unmet need.mp. or Health Services Research/ or Depriv\$.mp. or (Socio-economic or Socioeconomic).mp. or Information needs.mp.

21. Survivor\$.mp. or Survivors/

22. Patient Care Planning/ or Care plan.mp. or (Follow-up or Follow up).mp.

23. ("use of service\$" or "service use" or "service adj5 use").mp.

24. 10 or 11 or 12 or 13 or 14 or 15 or 16 or 17 or 18 or 19 or 20 or 21 or 22 or 23

25. 5 AND 6 AND 9 AND 24

## DATA COLLECTION AND ANALYSIS

### *Study records*

Identified records will be imported into and managed in EndNoteX7. Screened and selected articles will be managed in subsequent EndNote databases in order to track and record the number of records retained at each step. It is anticipated that given the relative lack of attention in the literature specifically examining the experience of managing long term conditions as a cancer survivor, the review will produce a small number of relevant studies.

### *Screening*

Screening of articles will adhere to the specified inclusion criteria (as detailed above; also see Box 2).

### **Box 2: Inclusion and exclusion criteria**

#### Inclusion criteria:

- Study population – Adults (over 18) with a diagnosis of cancer and at least one other LTC (as specified in appendix 1), carers and health professionals
- Articles relating to experience of illness from patient, carer and professional perspectives
- Articles focusing on psychosocial and supportive care, identity, quality of life, access to services and quality of care
- Studies with a qualitative empirical design

#### Exclusion criteria:

- Articles not meeting the above inclusion criterion.
- Articles published before 2000
- Articles focusing on long term side effects of cancer treatment or second primary cancers alone.

1  
2  
3  
4  
5  
6  
7  
8  
9  
10  
11 A three-step screening process will be undertaken to achieve the final set of included articles. Firstly, all titles  
12 will be read for relevance and fit with the inclusion criteria. Articles of no obvious relevance to the subject of  
13 the review or referring to the wrong study type (e.g. quantitative or theoretical pieces), will be filtered out at  
14 this stage. This process will be undertaken by the primary reviewer DC. Secondly, abstract screening will be  
15 undertaken by DC and another reviewer in adherence to systematic review guidelines to look in more detail  
16 for relevance and fit with the inclusion criteria in articles where it was not pertinently obvious from the title.  
17 Articles deemed irrelevant or of ineligible study type will be filtered out at this stage and included articles  
18 highlighted and saved in a new EndNote database. Any differences will be resolved by a third reviewer.  
19 Finally, full text articles of included studies will be obtained and read, again by DC and one other reviewer, to  
20 assess their suitability for inclusion in the final review. Full text articles deemed to meet the inclusion criteria  
21 will be selected and subject to quality appraisal and data extraction.  
22  
23  
24  
25  
26  
27  
28  
29  
30  
31  
32  
33  
34  
35

#### 36 *Data extraction*

37  
38 Data extraction will be managed in Microsoft Excel using a purpose designed proforma. Extracted material  
39 will be in line with the inclusion criteria and the designated aims of the review, derived from the article as a  
40 whole. Information will be gathered on: author; year of publication; country of study; study type; setting;  
41 relevant background and impetus for the study; methodological approach and specified methods; main  
42 findings including pertinent themes relating to psychosocial needs and supportive care; strengths and  
43 limitations; and key relevant discussion points. Extraction of data will be carried out by DC and checked by  
44 the second reviewer.  
45  
46  
47  
48  
49  
50  
51  
52

#### 53 *Quality assessment*

1  
2  
3 All included articles will be subject to critical appraisal using the Critical Appraisal Skills Programme (CASP)  
4  
5 tool. The 10-item CASP tool was considered to be the most suitable tool to consider the quality parameters  
6  
7 of qualitative work and is a well validated and accepted tool. In reference to the debate on exclusion of  
8  
9 qualitative articles on the basis of quality, no articles will be excluded on these grounds alone and a low  
10  
11 threshold for inclusion will be applied so that the review can benefit from researcher insight and theoretical  
12  
13 as well as empirical contributions (25-27). The relative quality of included studies will be critically considered  
14  
15 during the analysis and in reference to the developed synthesis. Quality assessment will be undertaken by  
16  
17 two independent reviewers and any differences of opinion will be discussed and reviewed by a third person  
18  
19 if no consensus is reached.  
20  
21

### 22 23 *Data synthesis*

24  
25 For a qualitative review seeking to explore personal lived experiences, it was important to find a method  
26  
27 that acknowledges the different paradigms and positions upon which each research output is based as well  
28  
29 as allowing for different study methods covering a broad and exploratory topic area. Meta-ethnography was  
30  
31 considered an appropriate method for this purpose (22), suited to reviewing a small body of exclusively  
32  
33 qualitative evidence (28). The meta-ethnographic technique was developed and used originally in education  
34  
35 research by Noblit and Hare but has more recently been of interest in nursing and health services research  
36  
37 (28, 29). Meta-ethnography gives rise to an interpretive account of the descriptive form found in qualitative  
38  
39 research rather than simply aggregating the data. The researcher is encouraged to consider the concepts  
40  
41 and themes that relate different studies and provide a mutual translation to ultimately produce a third order  
42  
43 account of the phenomenon of interest, thus inferring the social and cultural meaning of events (30), as a  
44  
45 grounded theory approach aims to do with primary data analysis (31, 32).  
46  
47  
48

49  
50 The meta-ethnographic approach offers three main techniques that will be applied to the extracted data and  
51  
52 themes: reciprocal translational analysis (RTA); refutational synthesis and lines of argument synthesis (LOA).  
53  
54 RTA will compare themes across the included studies for similarities using the matrix of the themes and  
55  
56 translate and integrate them with an overarching explanatory concept in a similar way to the constant  
57  
58  
59  
60

1  
2  
3 comparison technique used in a grounded theory approach. Refutational synthesis will identify and explain  
4  
5 any contradictions across the studies in the same way as deviant cases are utilised to reinforce dominant  
6  
7 concepts. Finally, a LOA synthesis will further develop concepts identified in the RTA to arrive at a 'third  
8  
9 order' or 'synthetic' theoretical framework that synthesises the evidence and provides new insights into the  
10  
11 focus of the review (28).  
12

## 13 14 15 **DISCUSSION**

16  
17 Insights from the proposed review will contribute to what is known, giving novel attention to the  
18  
19 combination of cancer with other long term chronic conditions. This is considered a necessary step in cancer  
20  
21 survivorship research and care in the face of the increasing, ageing population and the changing face of  
22  
23 primary care.  
24

25  
26 Building on the knowledge base will give rise to an evidence-based and theoretically informed integrated  
27  
28 model of care, with an emphasis on better understanding experiences of complex and multiple conditions  
29  
30 and the implications for managing 'cancer plus' in the push towards shared care or self-management (33).  
31

32  
33 The findings from the review will combine with empirical work by the authors to explore the needs of the  
34  
35 defined patient group to inform the development of a primary care or community based intervention to  
36  
37 better address their complex needs. The review will be published in a peer-reviewed journal and presented  
38  
39 at a relevant conference in addition to being shared with local interest groups and via online social media.  
40  
41  
42  
43  
44

45  
46 *Acknowledgements:* Thanks to Ms Marshall Dozier for advice on designing the review and searching  
47  
48 literature databases and to Dr Karen Barnett for advice on defining included long term conditions.  
49

50  
51 *Authors' contributions:* DC designed the systematic review with input from CC, SCB, EW and EB. DC drafted  
52  
53 the review protocol with input from CC, SCB, EW and EB. DC is guarantor of the review.  
54  
55  
56  
57  
58  
59  
60

1  
2  
3  
4  
5  
6  
7  
8  
9  
10  
11  
12  
13  
14  
15  
16  
17  
18  
19  
20  
21  
22  
23  
24  
25  
26  
27  
28  
29  
30  
31  
32  
33  
34  
35  
36  
37  
38  
39  
40  
41  
42  
43  
44  
45  
46  
47  
48  
49  
50  
51  
52  
53  
54  
55  
56  
57  
58  
59  
60

*Funding:* This review has been funded by the Scottish Government’s Chief Scientist Office (CSO); funding reference number: PDF/15/06. The CSO have provided financial support as part of a personal fellowship but are not involved in other aspect of the study design, implementation or analysis.

*Competing interests:* None declared

For peer review only

## REFERENCES

1. Information Services Division. Cancer In Scotland. 2014.
2. McLean G, Gunn J, Wyke S, Guthrie B, Watt GC, Blane DN, et al. The influence of socioeconomic deprivation on multimorbidity at different ages: a cross-sectional study. *The British journal of general practice : the journal of the Royal College of General Practitioners*. 2014;64(624):e440-7.
3. Barnett K, Mercer SW, Norbury M, Watt G, Wyke S, Guthrie B. Epidemiology of multimorbidity and implications for health care, research, and medical education: a cross-sectional study. *Lancet (London, England)*. 2012;380(9836):37-43.
4. Mason B, Nanton V, Epiphaniou E, Murray SA, Donaldson A, Shipman C, et al. 'My body's falling apart.' Understanding the experiences of patients with advanced multimorbidity to improve care: serial interviews with patients and carers. *BMJ supportive & palliative care*. 2014.
5. NHS Health Improvement and Macmillan Cancer Support. National Cancer Survivorship Initiative: Vision. 2010.
6. Smith SM, Soubhi H, Fortin M, Hudon C, O'Dowd T. Managing patients with multimorbidity: systematic review of interventions in primary care and community settings. *BMJ (Clinical research ed)*. 2012;345:e5205.
7. Snyder CF, Frick KD, Herbert RJ, Blackford AL, Neville BA, Lemke KW, et al. Comorbid condition care quality in cancer survivors: role of primary care and specialty providers and care coordination. *Journal of cancer survivorship : research and practice*. 2015;9(4):641-9.
8. Coventry PA, Small N, Panagioti M, Adeyemi I, Bee P. Living with complexity; marshalling resources: a systematic review and qualitative meta-synthesis of lived experience of mental and physical multimorbidity. *BMC family practice*. 2015;16(1):171.
9. Department of Health. Cancer Reform Strategy. 2007.
10. Scottish Government. Better Cancer Care: An Action Plan. 2008.
11. Adams E, Hill E, Watson E. Fertility preservation in cancer survivors: a national survey of oncologists' current knowledge, practice and attitudes. *British journal of cancer*. 2013;108(8):1602-15.
12. Harrison SE, Watson EK, Ward AM, Khan NF, Turner D, Adams E, et al. Primary health and supportive care needs of long-term cancer survivors: a questionnaire survey. *Journal of clinical oncology : official journal of the American Society of Clinical Oncology*. 2011;29(15):2091-8.
13. Adams E, Boulton M, Rose PW, Lund S, Richardson A, Wilson S, et al. A qualitative study exploring the experience of the partners of cancer survivors and their views on the role of primary care. *Supportive care in cancer : official journal of the Multinational Association of Supportive Care in Cancer*. 2012;20(11):2785-94.
14. Watson EK, Rose PW, Loftus R, Devane C. Cancer survivorship: the impact on primary care. *The British journal of general practice : the journal of the Royal College of General Practitioners*. 2011;61(592):e763-5.
15. Watson EK, O'Brien R, Campbell C, Weller D, Neal RD, Wilkinson C, et al. Views of health professionals on the role of primary care in the follow-up of men with prostate cancer. *Family practice*. 2011;28(6):647-54.

16. O'Brien R, Wyke S, Guthrie B, Watt G, Mercer S. An 'endless struggle': a qualitative study of general practitioners' and practice nurses' experiences of managing multimorbidity in socio-economically deprived areas of Scotland. *Chronic illness*. 2011;7(1):45-59.
17. France EF, Wyke S, Gunn JM, Mair FS, McLean G, Mercer SW. Multimorbidity in primary care: a systematic review of prospective cohort studies. *The British journal of general practice : the journal of the Royal College of General Practitioners*. 2012;62(597):e297-307.
18. Hemingway P, Brereton N. What is a systematic review? . What is? series2009.
19. Moher D, Liberati A, Tetzlaff J, Altman DG. Preferred reporting items for systematic reviews and meta-analyses: the PRISMA statement. *PLoS medicine*. 2009;6(7):e1000097.
20. Moher D, Shamseer L, Clarke M, Ghersi D, Liberati A, Petticrew M, et al. Preferred reporting items for systematic review and meta-analysis protocols (PRISMA-P) 2015 statement. *Systematic reviews*. 2015;4:1.
21. Barnett-Page E, Thomas J. Methods for the synthesis of qualitative research: a critical review. *BMC medical research methodology*. 2009;9:59.
22. Noblit G, Hare R. *Meta-Ethnography: Synthesising Qualitative Studies*: SAGE Publications; 1988.
23. Information Services Division. *Measuring Long Term Conditions in Scotland*. NHS National Services Scotland, June 2008.
24. Diederichs C, Berger K, Bartels DB. The measurement of multiple chronic diseases--a systematic review on existing multimorbidity indices. *The journals of gerontology Series A, Biological sciences and medical sciences*. 2011;66(3):301-11.
25. Mays N, Pope C. Qualitative research in health care. Assessing quality in qualitative research. *BMJ (Clinical research ed)*. 2000;320(7226):50-2.
26. Dixon-Woods M, Shaw RL, Agarwal S, Smith JA. The problem of appraising qualitative research. *Quality & safety in health care*. 2004;13(3):223-5.
27. Petticrew M, Roberts H. *Systematic Reviews in the Social Sciences: a Practical Guide*: Blackwell Publishing; 2006.
28. Dixon-Woods M, Cavers D, Agarwal S, Annandale E, Arthur A, Harvey J, et al. Conducting a critical interpretive synthesis of the literature on access to healthcare by vulnerable groups. *BMC medical research methodology*. 2006;6:35.
29. Lang H, France E, Williams B, Humphris G, Wells M. The psychological experience of living with head and neck cancer: a systematic review and meta-synthesis. *Psycho-oncology*. 2013;22(12):2648-63.
30. Geertz C. *The Interpretation of Cultures: Basic Books*; 1973.
31. Glaser B, Strauss A. *The Discovery of Grounded Theory: strategies for qualitative research*: Sociology Press; 1967.
32. Charmaz K. *Constructing Grounded Theory: A Practical Guide through Qualitative Analysis*. 2nd ed: SAGE; 2013.
33. Coffey L, Mooney O, Dunne S, Sharp L, Timmons A, Desmond D, et al. Cancer survivors' perspectives on adjustment-focused self-management interventions: a qualitative meta-synthesis. *Journal of cancer survivorship : research and practice*. 2016.



### Appendix 1: List of Long Term Conditions

Hypertension  
Depression  
Painful condition  
Asthma  
Coronary Heart Disease  
Dyspepsia  
Diabetes  
Thyroid Disorders  
Rheumatoid arthritis, other inflammatory polyarthropathies and systemic connective tissue disorders  
Hearing loss  
Chronic Obstructive Pulmonary Disease  
Anxiety and other neurotic, stress-related and somatoform disorders  
Irritable Bowel Syndrome  
Cancer  
Alcohol Problems  
Other psychoactive substance misuse  
Constipation  
Stroke or transient ischaemic attack  
Chronic kidney disease  
Diverticular disease of intestine  
Atrial fibrillation  
Peripheral vascular disease  
Heart failure  
Prostate disorders  
Glaucoma  
Epilepsy  
Dementia  
Schizophrenia  
Psoriasis or eczema  
Inflammatory bowel disease  
Migraine  
Blindness and low vision  
Chronic sinusitis  
Learning disability  
Anorexia or bulimia  
Bronchiectasis  
Parkinson's disease  
Multiple Sclerosis  
Viral hepatitis  
Chronic liver disease

**Source:** Adapted from: Barnett K, Mercer SW, Norbury M, Watt G, Wyke S, Guthrie B. Epidemiology of multimorbidity and implications for health care, research, and medical education: a cross-sectional study. *Lancet*, 2012;380(9836):37-43.

**PRISMA-P (Preferred Reporting Items for Systematic review and Meta-Analysis Protocols) 2015 checklist: recommended items to address in a systematic review protocol\***

| Section and topic                 | Item No | Checklist item                                                                                                                                                                                                                |
|-----------------------------------|---------|-------------------------------------------------------------------------------------------------------------------------------------------------------------------------------------------------------------------------------|
| <b>ADMINISTRATIVE INFORMATION</b> |         |                                                                                                                                                                                                                               |
| Title:                            |         |                                                                                                                                                                                                                               |
| Identification                    | 1a      | Identify the report as a protocol of a systematic review                                                                                                                                                                      |
| Update                            | 1b      | If the protocol is for an update of a previous systematic review, identify as such                                                                                                                                            |
| Registration                      | 2       | If registered, provide the name of the registry (such as PROSPERO) and registration number                                                                                                                                    |
| Authors:                          |         |                                                                                                                                                                                                                               |
| Contact                           | 3a      | Provide name, institutional affiliation, e-mail address of all protocol authors; provide physical mailing address of corresponding author                                                                                     |
| Contributions                     | 3b      | Describe contributions of protocol authors and identify the guarantor of the review                                                                                                                                           |
| Amendments                        | 4       | If the protocol represents an amendment of a previously completed or published protocol, identify as such and list changes; otherwise, state plan for documenting important protocol amendments                               |
| Support:                          |         |                                                                                                                                                                                                                               |
| Sources                           | 5a      | Indicate sources of financial or other support for the review                                                                                                                                                                 |
| Sponsor                           | 5b      | Provide name for the review funder and/or sponsor                                                                                                                                                                             |
| Role of sponsor or funder         | 5c      | Describe roles of funder(s), sponsor(s), and/or institution(s), if any, in developing the protocol                                                                                                                            |
| <b>INTRODUCTION</b>               |         |                                                                                                                                                                                                                               |
| Rationale                         | 6       | Describe the rationale for the review in the context of what is already known                                                                                                                                                 |
| Objectives                        | 7       | Provide an explicit statement of the question(s) the review will address with reference to participants, interventions, comparators, and outcomes (PICO)                                                                      |
| <b>METHODS</b>                    |         |                                                                                                                                                                                                                               |
| Eligibility criteria              | 8       | Specify the study characteristics (such as PICO, study design, setting, time frame) and report characteristics (such as years considered, language, publication status) to be used as criteria for eligibility for the review |
| Information sources               | 9       | Describe all intended information sources (such as electronic databases, contact with study authors, trial registers or other grey literature sources) with planned dates of coverage                                         |
| Search strategy                   | 10      | Present draft of search strategy to be used for at least one electronic database, including planned limits, such that it could be repeated                                                                                    |
| Study records:                    |         |                                                                                                                                                                                                                               |
| Data management                   | 11a     | Describe the mechanism(s) that will be used to manage records and data throughout the review                                                                                                                                  |

|                                    |     |                                                                                                                                                                                                                                                  |
|------------------------------------|-----|--------------------------------------------------------------------------------------------------------------------------------------------------------------------------------------------------------------------------------------------------|
| Selection process                  | 11b | State the process that will be used for selecting studies (such as two independent reviewers) through each phase of the review (that is, screening, eligibility and inclusion in meta-analysis)                                                  |
| Data collection process            | 11c | Describe planned method of extracting data from reports (such as piloting forms, done independently, in duplicate), any processes for obtaining and confirming data from investigators                                                           |
| Data items                         | 12  | List and define all variables for which data will be sought (such as PICO items, funding sources), any pre-planned data assumptions and simplifications                                                                                          |
| Outcomes and prioritization        | 13  | List and define all outcomes for which data will be sought, including prioritization of main and additional outcomes, with rationale                                                                                                             |
| Risk of bias in individual studies | 14  | Describe anticipated methods for assessing risk of bias of individual studies, including whether this will be done at the outcome or study level, or both; state how this information will be used in data synthesis                             |
| Data synthesis                     | 15a | Describe criteria under which study data will be quantitatively synthesised                                                                                                                                                                      |
|                                    | 15b | If data are appropriate for quantitative synthesis, describe planned summary measures, methods of handling data and methods of combining data from studies, including any planned exploration of consistency (such as $I^2$ , Kendall's $\tau$ ) |
|                                    | 15c | Describe any proposed additional analyses (such as sensitivity or subgroup analyses, meta-regression)                                                                                                                                            |
|                                    | 15d | If quantitative synthesis is not appropriate, describe the type of summary planned                                                                                                                                                               |
| Meta-bias(es)                      | 16  | Specify any planned assessment of meta-bias(es) (such as publication bias across studies, selective reporting within studies)                                                                                                                    |
| Confidence in cumulative evidence  | 17  | Describe how the strength of the body of evidence will be assessed (such as GRADE)                                                                                                                                                               |

**\* It is strongly recommended that this checklist be read in conjunction with the PRISMA-P Explanation and Elaboration (cite when available) for important clarification on the items. Amendments to a review protocol should be tracked and dated. The copyright for PRISMA-P (including checklist) is held by the PRISMA-P Group and is distributed under a Creative Commons Attribution Licence 4.0.**

*From: Shamseer L, Moher D, Clarke M, Ghersi D, Liberati A, Petticrew M, Shekelle P, Stewart L, PRISMA-P Group. Preferred reporting items for systematic review and meta-analysis protocols (PRISMA-P) 2015: elaboration and explanation. BMJ. 2015 Jan 2;349(jan02 1):g7647.*

# BMJ Open

## Experience of living with cancer and comorbid illness: protocol for a qualitative systematic review

|                                 |                                                                                                                                                                                                                                                                                                                                                                                                                        |
|---------------------------------|------------------------------------------------------------------------------------------------------------------------------------------------------------------------------------------------------------------------------------------------------------------------------------------------------------------------------------------------------------------------------------------------------------------------|
| Journal:                        | <i>BMJ Open</i>                                                                                                                                                                                                                                                                                                                                                                                                        |
| Manuscript ID                   | bmjopen-2016-013383.R1                                                                                                                                                                                                                                                                                                                                                                                                 |
| Article Type:                   | Protocol                                                                                                                                                                                                                                                                                                                                                                                                               |
| Date Submitted by the Author:   | 12-Oct-2016                                                                                                                                                                                                                                                                                                                                                                                                            |
| Complete List of Authors:       | Cavers, Debbie; University of Edinburgh, Centre for Population Health Sciences<br>CunninghamBurley, Sarah; University of Edinburgh, Public Health Sciences<br>Watson, Eila; Oxford Brookes University Faculty of Health and Life Sciences<br>Banks, Elspeth; NCRI Psychosocial Oncology and Survivorship Clinical Studies Group<br>Campbell, Christine; University of Edinburgh, Centre for Population Health Sciences |
| <b>Primary Subject Heading</b>: | Oncology                                                                                                                                                                                                                                                                                                                                                                                                               |
| Secondary Subject Heading:      | Qualitative research, Health services research, Patient-centred medicine, Sociology                                                                                                                                                                                                                                                                                                                                    |
| Keywords:                       | Cancer, Systematic review, Multimorbidity, Comorbidity, Qualitative synthesis                                                                                                                                                                                                                                                                                                                                          |
|                                 |                                                                                                                                                                                                                                                                                                                                                                                                                        |

SCHOLARONE™  
Manuscripts

Only

1  
2  
3 **Experience of living with cancer and comorbid illness: protocol for a qualitative systematic review**  
4  
5  
6  
7  
8  
9

10 Debbie Cavers, Sarah Cunningham-Burley, Eila Watson, Elspeth Banks, Christine Campbell  
11  
12

13  
14  
15 Author affiliations:  
16

17  
18 Debbie Cavers, CSO Research Fellow, University of Edinburgh, The Usher Institute of Population Health  
19  
20 Sciences and Informatics, Centre for Population Health Sciences, Medical School, Teviot Place, Edinburgh  
21  
22 EH8 9AG, UK.  
23

24 Sarah Cunningham-Burley, Professor of Medical and Family Sociology, University of Edinburgh, The Usher  
25  
26 Institute of Population Health Sciences and Informatics, Centre for Population Health Sciences, Medical  
27  
28 School, Teviot Place, Edinburgh EH8 9AG, UK.  
29

30 Eila Watson, Professor in Supportive Cancer Care, Oxford Brookes University, Faculty of Health and Life  
31  
32 Sciences, Jack Straws Lane, Marston, Oxford, OX3 0FL.  
33

34  
35 Elspeth Banks, Consumer Member, NCRI Psychosocial Oncology and Survivorship Clinical Studies Group,  
36  
37 Willowbank, Mill Road, Morningside, Wishaw, Lanarkshire, ML2 9QR.  
38

39 Christine Campbell, Senior Research Fellow, University of Edinburgh, The Usher Institute of Population  
40  
41 Health Sciences and Informatics, Centre for Population Health Sciences, Medical School, Teviot Place,  
42  
43 Edinburgh EH8 9AG, UK.  
44

45  
46  
47  
48 Correspondence to:  
49

50  
51 Dr Debbie Cavers, [Debbie.Cavers@ed.ac.uk](mailto:Debbie.Cavers@ed.ac.uk)  
52  
53  
54  
55  
56  
57  
58  
59  
60

**ABSTRACT**

Introduction: There is an increasing number of people living with and beyond cancer, whose experience is further complicated by additional long term health conditions in the context of an ageing population. The supportive care needs of this growing patient group should be recognised and addressed. There is a need to explore the experience of living with cancer and comorbid illness in order to develop optimal models of patient-centred care. This protocol describes a systematic review which aims to identify the qualitative evidence relating to the experience of cancer and comorbid illness for patients, informal carers and professionals, and to highlight areas where more research is needed.

Methods and Analysis: A systematic review following PRISMA guidance will be undertaken. Medline, Embase, CINAHL, PsycINFO, ASSIA, Sociological Abstracts, Web of Science, SCOPUS, OpenGrey and ProQuest Dissertations and Theses Global databases will be systematically searched for articles relevant to patient, carer and professional experiences. Two independent reviewers will screen articles for inclusion and evaluate them according to the Critical Appraisal Skills Programme (CASP) tool. Extracted data will be combined using recognised methods of qualitative synthesis to offer new insights into the topic area and for a patient-centred model of care.

Ethics and dissemination: The review does not require formal ethical review as no direct patient contact or patient identifiable data is used. Conduct of the review has been approved internally by the University of Edinburgh Centre for Population Health Sciences Ethics Review Committee. Results of the review will be published in a generalist peer-reviewed journal and presented at a relevant conference in addition to informing subsequent empirical work by the authors on this topic area.

**Strengths and limitations of this study:**

- Protocol for a systematic review of current literature exploring a highly important topic presenting a current challenge to health care provision
- Using robust methodology following standardised guidelines
- Scope to inform policy and practice and improve patient care
- Systematic review of qualitative empirical evidence only; does not cover quantitative studies or existing systematic reviews but can give important insights.
- Large evidence base for experience of cancer and experience of multi-morbidity, but little linking the two bodies of evidence, presenting a challenge to the reviewers.

## INTRODUCTION

Due to the ageing population and better screening, diagnosis and treatments, there are an increasing number of people living with and beyond cancer (1). The lived experience of these individuals is often complicated by the presence of other comorbid chronic illnesses; as many as 78% of cancer patients are living with at least one other condition, the prevalence of which also increase with age (2, 3). Therefore, the support needs of people living with multiple complex conditions are enduring and need to be identified and addressed (4). In addition to the challenges facing secondary care (5), there is increasing recognition of the role of primary care in the provision of ongoing support to cancer patients, particularly after the completion of hospital-based treatment as patients adjust to life post treatment, living with ongoing medical issues related to their cancer treatment (6, 7). This picture becomes more complex in the presence of other long term conditions, with implications for the coordination of quality care and support (8, 9).

Meeting the needs of people living beyond cancer has been identified as a policy priority (10), which informed the development of the National Cancer Survivorship Initiative (6) in England and Wales; survivorship also forms part of the remit for Scotland's Better Cancer Care (11). In many cases survivorship initiatives and research target the clinical needs related to long term side effects (12). However, psychosocial support for survivors of cancer is another important consideration and has implications for the role of primary, secondary and community care. While valuable research has been conducted to understand better these dimensions of life for the patient, and their relatives (13-17), less is known about the impact of additional chronic illness on patients' lived experience. As such, service development and provision would benefit from further in-depth research in this area (7, 18). Understanding the challenges experienced by people living after a cancer diagnosis with other chronic conditions such as COPD, diabetes or mental ill health, can give new insights into patient-centred models of care.

### Objectives

While addressing the holistic needs of cancer survivors form part of the vision of survivorship initiatives, and there is growing body of work exploring experience of multi-morbidity (19), there is a dearth of research



1  
2  
3 linking cancer with comorbid disease to further enrich our understanding of living with such complex illness.  
4  
5 This systematic review aims to synthesise and report on published evidence exploring the experience of  
6  
7 cancer survivorship in connection with that of other long term conditions in order to identify critical research  
8  
9 questions. The findings from the review will combine with those from a separate patient-centred research  
10  
11 prioritisation exercise to set a qualitative empirical research agenda for future work.  
12  
13

14 *Research questions:*

- 15
- 16
- 17 • What are the findings of qualitative evidence exploring the *experience* of living with both cancer and
- 18 one or more comorbidities from patient, carer and provider perspectives?
- 19
- 20
- 21 • What are the psychosocial support needs of people living with cancer and one or more other long
- 22 term condition(s) identified in the literature?
- 23
- 24
- 25 • What are patient, carer and provider experiences of service provision reported in the literature?
- 26
- 27
- 28 • What research priorities can be derived from the available evidence?
- 29
- 30

31 **REVIEW METHODS**

32  
33  
34 *Design*

35  
36 A systematic review of the current evidence linking experience of cancer with comorbid illness is considered  
37  
38 a robust way of identifying and synthesising the published evidence in this area to define a cohesive  
39  
40 empirical research agenda that builds on prior knowledge (20). The review will include qualitative evidence  
41  
42 only to produce an interpretation built on people's views and experiences; acknowledging the rich context  
43  
44 and different dimensions of the lived experience from the perspective of those experiencing it. Further, a  
45  
46 synthesis of qualitative data aims to generate findings that are meaningful, relevant and appropriate to  
47  
48 individuals, to inform a qualitative research agenda, and ultimately to more effectively influence policy and  
49  
50 practice influencing patient outcomes (21).  
51  
52

53  
54 The review is based on the PRISMA statement guidance for conducting a systematic review (22), and the  
55  
56 protocol follows the relevant items on the PRISMA-P checklist (23). The review protocol has been registered  
57  
58

1  
2  
3 on the International Prospective Register of Systematic Reviews (PROSPERO) database (registration number:  
4  
5 CRD42016041796).

6  
7  
8 The review will use methods of qualitative synthesis to combine, integrate and interpret, where possible, the  
9  
10 evidence from the included papers (see eligibility and data synthesis sections below)(21, 24). The review  
11  
12 aims to move beyond the aggregation of available data to provide further interpretive insights into living  
13  
14 with complex illness and define where future research can add to what is known (24).  
15

16  
17 No formal ethical approval is required for this study as it will not include patient identifiable data. It has been  
18  
19 internally approved by the University of Edinburgh Centre for Population Health Sciences Ethics Review  
20  
21 Committee (Ref: 8/03/2016).  
22

### 23 24 *Eligibility criteria*

25  
26 The review will include qualitative empirical studies, including unpublished grey literature. Qualitative data  
27  
28 from mixed methods studies will be screened for inclusion and included if the qualitative component is  
29  
30 relevant. Included articles will be published between 2000 and the present day to ensure the currency of the  
31  
32 work while enabling a broad view of developing issues to be identified. Articles will be included that address  
33  
34 the lived experience of the cancer journey with attention to existing long term health conditions (developed  
35  
36 before or after the cancer diagnosis), and will identify issues related to psychosocial and supportive care as  
37  
38 outlined in relation to the anticipated dimensions of interest. Articles will be included from across the cancer  
39  
40 continuum from diagnosis through to end of life and will include the perspectives of adult patients (aged 18  
41  
42 or over), informal carers and health care professionals. The review will include only articles published in  
43  
44 English.  
45  
46

47  
48 Studies will be included for any cancer type in combination with one or more comorbid long term condition  
49  
50 (LTC), also described as cancer multi-morbidity. Long term conditions to be included will be guided by those  
51  
52 listed in Barnett et al's paper mapping the epidemiology of multi-morbidity (3) (See Appendix 1 for a full list  
53  
54 of conditions). The applied definition of long term conditions is based on ISD Scotland's report on important  
55  
56 long term conditions in Scotland; the report uses, among others, the Long Term Conditions Collaborative to  
57  
58

1  
2  
3 define an LTC as, 'one that requires ongoing care, limits what one can do and is likely to last longer than a  
4  
5 year'(25). Long term side effects of cancer treatment and second primary cancers are not included;  
6  
7 experience of second primary cancers is being addressed separately within the research centre. Where it is  
8  
9 not possible to determine whether the condition is caused by cancer treatment, the article will be included  
10  
11 in the review but analysed separately.  
12

### 13 *Dimensions of interest*

14  
15 The review focuses on an exploration of the dimensions of lived experience: physical, social, emotional and  
16  
17 psychological. From a similar study exploring multiple dimensions of experience, these are expected to  
18  
19 include such topics as quality of life, well-being, psychosocial supportive care needs, attitude and identity,  
20  
21 perceived continuity and quality of care, and influence of personal demographics (age, gender, ethnicity,  
22  
23 socio-economic status) (26). In relation to how services can best meet patients' needs, topics may include  
24  
25 issues of accessing appropriate services, coordination of care for multiple conditions, and self-management  
26  
27 across the cancer care continuum (17, 19) . The search strategy has been developed to reflect these broad  
28  
29 and exploratory domains. The outcomes will depend on the evidence available and gaps in the evidence will  
30  
31 be highlighted for future study.  
32  
33  
34

### 35 *Information sources*

36  
37 A variety of search strategies will be used to identify potential literature for the review, particularly given  
38  
39 the challenges in identifying qualitative evidence (27). This will primarily involve a literature database search  
40  
41 (including grey literature), but will also include citation and snowball searching, known expert consultation  
42  
43 via email, related articles searches in PubMed and use of Google scholar. The databases to be consulted are:  
44  
45 Medline, Embase, CINAHL, PsycINFO, ASSIA, Sociological Abstracts, Web of Science, SCOPUS and, for grey  
46  
47 literature, OpenGrey and ProQuest Dissertations and Theses Global. These are considered sufficient to  
48  
49 comprehensively cover the range of topics and disciplines implicated in this review.  
50  
51  
52  
53  
54  
55  
56  
57  
58  
59  
60

### Search strategy

The searching phase aims to identify relevant studies for inclusion in the review. The process of searching will begin with individually searching each of the listed databases using an adapted list of search terms; the developed search strategy for Medline is shown in Box 1. The search terms will be adapted to suit each database to derive the most meaningful search and will use free text, MeSH and subject headings for maximum sensitivity and specificity.

#### Box 1: Example search strategy for Medline

1. Comorbidity/
2. (Multimorbid\$ or multi-morbid\$ or Co-morbid\$).mp. [mp=title, abstract, original title, name of substance word, subject heading word, keyword heading word, protocol supplementary concept word, rare disease supplementary concept word, unique identifier]
3. Chronic Disease/ or (Chronic adj5 (illness\$ or condition\$ or disease)).tw.
4. (Long term adj5 (condition\$ or illness\$ or disease\$)).mp. [mp=title, abstract, original title, name of substance word, subject heading word, keyword heading word, protocol supplementary concept word, rare disease supplementary concept word, unique identifier]
5. 1 or 2 or 3 or 4
6. Neoplasms/ or Cancer.mp or (Tumour or tumor or Oncology or Neoplasm).mp. [mp=title, abstract, original title, name of substance word, subject heading word, keyword heading word, protocol supplementary concept word, rare disease supplementary concept word, unique identifier]
7. Qualitative Research/ or Qualitative.mp or Interview/ r Interview\$.mp or In-depth.mp
8. (Focus Group or or Ethnograph\$ or Observation\$ or Participant\$ or Respondent\$ or View\$ or Belief\$ or Attitude\$ or Awareness or Perspective\$ or Understanding\$ or Findings or Grounded Theory or Social Construction\$ or Theoretical or Phenomenolog\$).mp. [mp=title, abstract, original title, name of substance word, subject heading word, keyword heading word, protocol supplementary concept word, rare disease supplementary concept word, unique identifier]
9. 7 or 8
10. Psychosocial.mp. or Stress, Psychological/ or Social Support/ or Psycho-social.mp or "Quality of Life"/ or "Experience of Illness".mp or Experience adj5 Illness or Attitude to Health/ or "Quality of Life".mp or Happ\$.mp or Emotion\$.mp. or Emotions/
11. Patient satisfaction.mp. or Patient Satisfaction/ or "Quality of Health Care"/ or "Patient Experience".mp or Satisfaction.mp or "Information Preferences".mp or Decision Making/ or (Decision-making or Decision Making).mp or (Informed choice or Informed Decision Making).mp or Self management.mp. or Self Care/ or "Continuity of Patient Care"/ or Integrated care.mp
12. Access to Health Care.mp. or Health Services Accessibility/
13. Identity.mp. or gender.mp. or Gender Identity/
14. (Health behaviour or Health behavior).mp.
15. (Help-seeking or Help seeking).mp.
16. (Well-being or Well being).mp. or Holistic.mp or Continuity of Care.mp or "Continuity of Patient Care"/ or (Fragmented adj5 care).mp or (joined-up or Joined Up).mp or Integrated care.mp or Diversity of Care.mp.
17. Primary care.mp. or Primary Health Care/ or Secondary care.mp. or Secondary Care/ or Community Care.mp or Community Health Services/ or Ambulatory Care.mp. or Ambulatory Care/ or "Delivery of Health Care, Integrated"/ or Preventive Health Services/ or Family Practice/ or Shared care.mp or Collaborat\$ care.mp

1  
2  
3  
4 18. (Patient-centred care or Patient centred care or Patient-centred or Person-centred or Patient centred or Person  
5 centred).mp or Patient-Centered Care/

6 19. Palliative Care/ or Supportive care.mp. or palliative.mp.

7  
8 20. "Health Services Needs and Demand"/ or unmet need.mp. or Health Services Research/ or Depriv\$.mp. or (Socio-  
9 economic or Socioeconomic).mp. or Information needs.mp.

10 21. Survivor\$.mp. or Survivors/

11 22. Patient Care Planning/ or Care plan.mp. or (Follow-up or Follow up).mp.

12 23. ("use of service\$" or "service use" or "service adj5 use").mp.

13 24. 10 or 11 or 12 or 13 or 14 or 15 or 16 or 17 or 18 or 19 or 20 or 21 or 22 or 23

14 25. 5 AND 6 AND 9 AND 24  
15  
16

17  
18  
19  
20 **DATA COLLECTION AND ANALYSIS**

21 *Study records*

22  
23 Identified records will be imported into and managed in EndNoteX7. Screened and selected articles will be  
24 managed in subsequent EndNote databases in order to track and record the number of records retained at  
25 each step. It is anticipated that given the relative lack of attention in the literature specifically examining the  
26 experience of long term conditions as a cancer survivor, the review will produce a small number of relevant  
27 but heterogeneous studies.  
28  
29  
30  
31  
32  
33

34  
35 *Screening*

36  
37 Screening of articles will adhere to the specified inclusion criteria (as detailed above; also see Box 2).  
38  
39

40 **Box 2: Inclusion and exclusion criteria**

41  
42  
43  
44 **Inclusion criteria:**

- 45 • Study population – Adults (over 18) with a diagnosis of cancer and at least one other
- 46 LTC (as specified in appendix 1), carers and health professionals
- 47 • Articles relating to experience of illness from patient, carer and professional
- 48 perspectives
- 49 • Articles focusing on areas denoted in the dimensions of interest
- 50 • Studies with a qualitative empirical design
- 51 • Articles published in English

52  
53  
54  
55 **Exclusion criteria:**

- 56 • Articles not meeting the above inclusion criterion.
- 57 • Articles published before 2000
- 58 • Articles focusing on long term side effects of cancer treatment or second primary
- 59 cancers alone.

1  
2  
3  
4  
5  
6  
7  
8  
9  
10  
11 A three-step screening process will be undertaken to achieve the final set of included articles. Firstly, all *titles*  
12 will be read and those of no obvious relevance will be excluded. This process will be undertaken by the  
13 primary reviewer DC. Secondly, *abstract screening* will be undertaken by DC and another reviewer to look in  
14 more detail for relevance and fit with the inclusion criteria. Any differences in judgement will be resolved by  
15 a third reviewer. Finally, *full text* articles of remaining studies will be obtained and read, again by DC and one  
16 other reviewer, to assess their suitability for inclusion in the final review. Full text articles deemed to meet  
17 the inclusion criteria will be selected and subject to quality appraisal and data extraction.

#### 27 *Data extraction*

28  
29  
30 Data extraction will be managed in Microsoft Excel using a purpose designed proforma. Extracted material  
31 will reflect the inclusion criteria and the designated aims of the review, derived from the article as a whole.  
32 Information will be gathered on: author; year of publication; country of study; study type; setting; relevant  
33 background and impetus for the study; methodological approach and specified methods; patient  
34 characteristics and demographics including cancer and comorbidity type; main findings including pertinent  
35 themes relating to experience of illness, psychosocial needs and supportive care; strengths and limitations;  
36 and key relevant discussion points. Extraction of data will be carried out by DC and the second reviewer.

#### 46 *Quality assessment*

47  
48 All included articles will be subject to critical appraisal using the Critical Appraisal Skills Programme (CASP)  
49 tool. The 10-item CASP tool was considered to be the most suitable tool to consider the quality parameters  
50 of qualitative work and is a well validated and accepted tool. In reference to the debate on exclusion of  
51 qualitative articles on the basis of quality, no articles will be excluded on these grounds alone and a low  
52 threshold for inclusion will be applied so that the review can benefit from researcher insight and theoretical

1  
2  
3 as well as empirical contributions (28-30). The relative quality of included studies will be critically considered  
4  
5 during the analysis and in reference to the developed synthesis. Quality assessment will be undertaken by  
6  
7 two independent reviewers and any differences of opinion will be discussed and reviewed by a third person  
8  
9 if no consensus is reached.  
10

### 11 12 *Data synthesis*

13  
14 For a qualitative review seeking to explore personal lived experiences, it was important to find a method  
15  
16 that acknowledges the different paradigms and positions upon which each research output is based as well  
17  
18 as allowing for different study methods covering a broad and exploratory topic area (31). Meta-ethnography,  
19  
20 used originally in education research by Noblit and Hare but has more recently been of interest in nursing  
21  
22 and health services research (32-34), was considered as an appropriate method for this purpose as it is  
23  
24 suited to reviewing a small body of exclusively qualitative evidence and gives rise to a meaningful  
25  
26 interpretive account rather than simply aggregating the data (32, 35, 36). Reporting guidance for meta-  
27  
28 ethnography is in development (37). However, thematic synthesis, developed by Thomas and Harden,  
29  
30 provides a prescriptive approach that lends itself well to transparency and quality in the conduct and  
31  
32 reporting of the review, and in generating hypotheses to meet the review's objective of generating further  
33  
34 empirical research questions (21, 24). Like meta-ethnography, this method encourages the researcher to  
35  
36 consider the concepts and themes that relate different studies - through line by line coding, developing  
37  
38 descriptive themes and generating analytic themes - to provide a mutual translation and ultimately produce  
39  
40 an interpretive account of the phenomenon of interest, as a grounded theory approach aims to do with  
41  
42 primary data analysis (38, 39).  
43  
44  
45  
46  
47

48 Given the anticipated yield of a small heterogeneous body of evidence meeting the eligibility criteria for the  
49  
50 review, a narrative-based summary may be more appropriate and achievable using steps one and two of  
51  
52 Thomas and Harden's thematic synthesis (21). Extracted data will be combined and described using the most  
53  
54 appropriate method to reflect the evidence available. Where possible, an interpretive account of the data  
55  
56  
57  
58

1  
2  
3 will be presented in the context of a critical review of the evidence. The descriptive or conceptual outputs  
4  
5 will be related to the research questions and objectives.  
6  
7  
8  
9

## 10 11 **DISCUSSION**

12  
13 Insights from the proposed review will contribute to what is known, giving novel attention to the  
14  
15 combination of cancer with other long term chronic conditions. This is considered a necessary step in cancer  
16  
17 survivorship research and care in the face of the increasing, ageing population and the shifting emphasis in  
18  
19 patient care.  
20

21  
22 Building on the knowledge base will contribute to an evidence-based and conceptually informed integrated  
23  
24 model of care, with an emphasis on better understanding experiences of complex and multiple conditions  
25  
26 and the implications for living with cancer and comorbid illness in the push towards shared care or self-  
27  
28 management (40).  
29  
30

31  
32 While conceptual and theoretical insights to a subject area can add richness to the academic evidence base,  
33  
34 it is important to produce a robust qualitative synthesis that reflects the identified evidence (24). A narrative  
35  
36 summary can adequately meet the proposed objectives, provide answers to the research questions and  
37  
38 speak meaningfully to policy directives.  
39  
40

41  
42 The findings from the review will combine with patient engagement work by the authors to inform an  
43  
44 empirical study exploring the needs of the defined patient group and the development of an intervention to  
45  
46 better address their complex needs. The review will be published in a peer-reviewed journal and presented  
47  
48 at a relevant conference in addition to being shared with local interest groups and via online social media.  
49

50  
51 *Acknowledgements:* Thanks to Ms Marshall Dozier, Academic Liaison Librarian, for advice on designing the  
52  
53 review and searching literature databases and to Dr Karen Barnett for advice on defining included long term  
54  
55 conditions.  
56  
57  
58



1  
2  
3 *Authors' contributions:* DC designed the systematic review with input from CC, SCB, EW and EB. DC drafted  
4  
5 the review protocol with input from CC, SCB, EW and EB. DC is guarantor of the review.  
6  
7

8 *Funding:* This review has been funded by the Scottish Government's Chief Scientist Office (CSO); funding  
9  
10 reference number: PDF/15/06. The CSO have provided financial support as part of a personal fellowship but  
11  
12 are not involved in other aspect of the study design, implementation or analysis.  
13

14  
15 *Competing interests:* None declared  
16  
17  
18  
19  
20  
21  
22  
23  
24  
25  
26  
27  
28  
29  
30  
31  
32  
33  
34  
35  
36  
37  
38  
39  
40  
41  
42  
43  
44  
45  
46  
47  
48  
49  
50  
51  
52  
53  
54  
55  
56  
57  
58  
59  
60

## REFERENCES

1. Information Services Division. Cancer In Scotland. 2014.
2. McLean G, Gunn J, Wyke S, Guthrie B, Watt GC, Blane DN, et al. The influence of socioeconomic deprivation on multimorbidity at different ages: a cross-sectional study. *The British journal of general practice : the journal of the Royal College of General Practitioners*. 2014;64(624):e440-7.
3. Barnett K, Mercer SW, Norbury M, Watt G, Wyke S, Guthrie B. Epidemiology of multimorbidity and implications for health care, research, and medical education: a cross-sectional study. *Lancet (London, England)*. 2012;380(9836):37-43.
4. Mason B, Nanton V, Epiphaniou E, Murray SA, Donaldson A, Shipman C, et al. 'My body's falling apart.' Understanding the experiences of patients with advanced multimorbidity to improve care: serial interviews with patients and carers. *BMJ supportive & palliative care*. 2014.
5. Smith SM, Allwright S, O'Dowd T. Does sharing care across the primary-specialty interface improve outcomes in chronic disease? A systematic review. *The American journal of managed care*. 2008;14(4):213-24.
6. NHS Health Improvement and Macmillan Cancer Support. National Cancer Survivorship Initiative: Vision. 2010.
7. Smith SM, Soubhi H, Fortin M, Hudon C, O'Dowd T. Managing patients with multimorbidity: systematic review of interventions in primary care and community settings. *BMJ (Clinical research ed)*. 2012;345:e5205.
8. Snyder CF, Frick KD, Herbert RJ, Blackford AL, Neville BA, Lemke KW, et al. Comorbid condition care quality in cancer survivors: role of primary care and specialty providers and care coordination. *Journal of cancer survivorship : research and practice*. 2015;9(4):641-9.
9. Williams GR, Mackenzie A, Magnuson A, Olin R, Chapman A, Mohile S, et al. Comorbidity in older adults with cancer. *Journal of geriatric oncology*. 2015.
10. Department of Health. Cancer Reform Strategy. 2007.
11. Scottish Government. Better Cancer Care: An Action Plan. 2008.
12. Adams E, Hill E, Watson E. Fertility preservation in cancer survivors: a national survey of oncologists' current knowledge, practice and attitudes. *British journal of cancer*. 2013;108(8):1602-15.
13. Harrison SE, Watson EK, Ward AM, Khan NF, Turner D, Adams E, et al. Primary health and supportive care needs of long-term cancer survivors: a questionnaire survey. *Journal of clinical oncology : official journal of the American Society of Clinical Oncology*. 2011;29(15):2091-8.
14. Adams E, Boulton M, Rose PW, Lund S, Richardson A, Wilson S, et al. A qualitative study exploring the experience of the partners of cancer survivors and their views on the role of primary care. *Supportive care in cancer : official journal of the Multinational Association of Supportive Care in Cancer*. 2012;20(11):2785-94.
15. Watson EK, Rose PW, Loftus R, Devane C. Cancer survivorship: the impact on primary care. *The British journal of general practice : the journal of the Royal College of General Practitioners*. 2011;61(592):e763-5.
16. Watson EK, O'Brien R, Campbell C, Weller D, Neal RD, Wilkinson C, et al. Views of health professionals on the role of primary care in the follow-up of men with prostate cancer. *Family practice*. 2011;28(6):647-54.
17. O'Brien R, Wyke S, Guthrie B, Watt G, Mercer S. An 'endless struggle': a qualitative study of general practitioners' and practice nurses' experiences of managing multimorbidity in socio-economically deprived areas of Scotland. *Chronic illness*. 2011;7(1):45-59.
18. France EF, Wyke S, Gunn JM, Mair FS, McLean G, Mercer SW. Multimorbidity in primary care: a systematic review of prospective cohort studies. *The British journal of general practice : the journal of the Royal College of General Practitioners*. 2012;62(597):e297-307.

19. Coventry PA, Small N, Panagioti M, Adeyemi I, Bee P. Living with complexity; marshalling resources: a systematic review and qualitative meta-synthesis of lived experience of mental and physical multimorbidity. *BMC family practice*. 2015;16(1):171.
20. Hemingway P, Brereton N. What is a systematic review? . What is? series2009.
21. Thomas J, Harden A. Methods for the thematic synthesis of qualitative research in systematic reviews. *BMC medical research methodology*. 2008;8:45.
22. Moher D, Liberati A, Tetzlaff J, Altman DG. Preferred reporting items for systematic reviews and meta-analyses: the PRISMA statement. *PLoS medicine*. 2009;6(7):e1000097.
23. Moher D, Shamseer L, Clarke M, Ghersi D, Liberati A, Petticrew M, et al. Preferred reporting items for systematic review and meta-analysis protocols (PRISMA-P) 2015 statement. *Systematic reviews*. 2015;4:1.
24. Barnett-Page E, Thomas J. Methods for the synthesis of qualitative research: a critical review. *BMC medical research methodology*. 2009;9:59.
25. Information Services Division. Measuring Long Term Conditions in Scotland. NHS National Services Scotland, 2008 June Report No.
26. Cavers D, Hacking B, Erridge SC, Morris PG, Kendall M, Murray SA. Adjustment and support needs of glioma patients and their relatives: serial interviews. *Psycho-oncology*. 2013;22(6):1299-305.
27. Shaw RL, Booth A, Sutton AJ, Miller T, Smith JA, Young B, et al. Finding qualitative research: an evaluation of search strategies. *BMC medical research methodology*. 2004;4:5.
28. Mays N, Pope C. Qualitative research in health care. Assessing quality in qualitative research. *BMJ (Clinical research ed)*. 2000;320(7226):50-2.
29. Dixon-Woods M, Shaw RL, Agarwal S, Smith JA. The problem of appraising qualitative research. *Quality & safety in health care*. 2004;13(3):223-5.
30. Petticrew M, Roberts H. *Systematic Reviews in the Social Sciences: a Practical Guide*: Blackwell Publishing; 2006.
31. Dixon-Woods M, Fitzpatrick R. Qualitative research in systematic reviews. *BMJ (Clinical research ed)*. 2001;323:765.
32. Dixon-Woods M, Cavers D, Agarwal S, Annandale E, Arthur A, Harvey J, et al. Conducting a critical interpretive synthesis of the literature on access to healthcare by vulnerable groups. *BMC medical research methodology*. 2006;6:35.
33. Lang H, France E, Williams B, Humphris G, Wells M. The psychological experience of living with head and neck cancer: a systematic review and meta-synthesis. *Psycho-oncology*. 2013;22(12):2648-63.
34. Britten N, Campbell R, Pope C, Donovan J, Morgan M, Pill R. Using meta ethnography to synthesise qualitative research: a worked example. *J Health Serv Res Pol*. 2002;7.
35. Noblit G, Hare R. *Meta-Ethnography: Synthesising Qualitative Studies*: SAGE Publications; 1988.
36. Campbell R, Pound P, Morgan M, Daker-White G, Britten N, Pill R, et al. *Evaluating meta-ethnography: systematic analysis and synthesis of qualitative research*2011.
37. France EF, Ring N, Thomas R, Noyes J, Maxwell M, Jepson R. A methodological systematic review of what's wrong with meta-ethnography reporting. *BMC medical research methodology*. 2014;14(1):1-16.
38. Glaser B, Strauss A. *The Discovery of Grounded Theory: strategies for qualitative research*: Sociology Press; 1967.
39. Charmaz K. *Constructing Grounded Theory: A Practical Guide through Qualitative Analysis*. 2nd ed: SAGE; 2013.
40. Coffey L, Mooney O, Dunne S, Sharp L, Timmons A, Desmond D, et al. Cancer survivors' perspectives on adjustment-focused self-management interventions: a qualitative meta-synthesis. *Journal of cancer survivorship : research and practice*. 2016.

## Appendix 1: List of Long Term Conditions

Hypertension  
Depression  
Painful condition  
Asthma  
Coronary Heart Disease  
Dyspepsia  
Diabetes  
Thyroid Disorders  
Rheumatoid arthritis, other inflammatory polyarthropathies and systemic connective tissue disorders  
Hearing loss  
Chronic Obstructive Pulmonary Disease  
Anxiety and other neurotic, stress-related and somatoform disorders  
Irritable Bowel Syndrome  
Cancer  
Alcohol Problems  
Other psychoactive substance misuse  
Constipation  
Stroke or transient ischaemic attack  
Chronic kidney disease  
Diverticular disease of intestine  
Atrial fibrillation  
Peripheral vascular disease  
Heart failure  
Prostate disorders  
Glaucoma  
Epilepsy  
Dementia  
Schizophrenia  
Psoriasis or eczema  
Inflammatory bowel disease  
Migraine  
Blindness and low vision  
Chronic sinusitis  
Learning disability  
Anorexia or bulimia  
Bronchiectasis  
Parkinson's disease  
Multiple Sclerosis  
Viral hepatitis  
Chronic liver disease

**Source:** Adapted from: Barnett K, Mercer SW, Norbury M, Watt G, Wyke S, Guthrie B. Epidemiology of multimorbidity and implications for health care, research, and medical education: a cross-sectional study. *Lancet*, 2012;380(9836):37-43.

**PRISMA-P (Preferred Reporting Items for Systematic review and Meta-Analysis Protocols) 2015 checklist: recommended items to address in a systematic review protocol\***

| Section and topic                 | Item No | Checklist item                                                                                                                                                                                                                           |
|-----------------------------------|---------|------------------------------------------------------------------------------------------------------------------------------------------------------------------------------------------------------------------------------------------|
| <b>ADMINISTRATIVE INFORMATION</b> |         |                                                                                                                                                                                                                                          |
| Title:                            |         |                                                                                                                                                                                                                                          |
| Identification                    | 1a      | Identify the report as a protocol of a systematic review ✓ (title page, main document)                                                                                                                                                   |
| Update                            | 1b      | If the protocol is for an update of a previous systematic review, identify as such n/a                                                                                                                                                   |
| Registration                      | 2       | If registered, provide the name of the registry (such as PROSPERO) and registration number PROSPERO registration number: CRD42016041796 (page 5, main document)                                                                          |
| Authors:                          |         |                                                                                                                                                                                                                                          |
| Contact                           | 3a      | Provide name, institutional affiliation, e-mail address of all protocol authors; provide physical mailing address of corresponding author ✓ (title page)                                                                                 |
| Contributions                     | 3b      | Describe contributions of protocol authors and identify the guarantor of the review ✓ (page 11)                                                                                                                                          |
| Amendments                        | 4       | If the protocol represents an amendment of a previously completed or published protocol, identify as such and list changes; otherwise, state plan for documenting important protocol amendments n/a                                      |
| Support:                          |         |                                                                                                                                                                                                                                          |
| Sources                           | 5a      | Indicate sources of financial or other support for the review ✓ (page 12)                                                                                                                                                                |
| Sponsor                           | 5b      | Provide name for the review funder and/or sponsor ✓ (page 12)                                                                                                                                                                            |
| Role of sponsor or funder         | 5c      | Describe roles of funder(s), sponsor(s), and/or institution(s), if any, in developing the protocol ✓ (page 12)                                                                                                                           |
| <b>INTRODUCTION</b>               |         |                                                                                                                                                                                                                                          |
| Rationale                         | 6       | Describe the rationale for the review in the context of what is already known ✓ (page 3, introduction)                                                                                                                                   |
| Objectives                        | 7       | Provide an explicit statement of the question(s) the review will address with reference to participants, interventions, comparators, and outcomes (PICO) ✓ (page 4, objectives)                                                          |
| <b>METHODS</b>                    |         |                                                                                                                                                                                                                                          |
| Eligibility criteria              | 8       | Specify the study characteristics (such as PICO, study design, setting, time frame) and report characteristics (such as years considered, language, publication status) to be used as criteria for eligibility for the review ✓ (page 5) |
| Information sources               | 9       | Describe all intended information sources (such as electronic databases, contact with study authors, trial registers or other                                                                                                            |

|                                    |     |                                                                                                                                                                                                                                                                              |
|------------------------------------|-----|------------------------------------------------------------------------------------------------------------------------------------------------------------------------------------------------------------------------------------------------------------------------------|
|                                    |     | grey literature sources) with planned dates of coverage ✓ (page 6)                                                                                                                                                                                                           |
| Search strategy                    | 10  | Present draft of search strategy to be used for at least one electronic database, including planned limits, such that it could be repeated ✓ (page 6-8)                                                                                                                      |
| Study records:                     |     |                                                                                                                                                                                                                                                                              |
| Data management                    | 11a | Describe the mechanism(s) that will be used to manage records and data throughout the review ✓ (page 8)                                                                                                                                                                      |
| Selection process                  | 11b | State the process that will be used for selecting studies (such as two independent reviewers) through each phase of the review (that is, screening, eligibility and inclusion in meta-analysis) ✓ (page 9)                                                                   |
| Data collection process            | 11c | Describe planned method of extracting data from reports (such as piloting forms, done independently, in duplicate), any processes for obtaining and confirming data from investigators ✓ (page 9)                                                                            |
| Data items                         | 12  | List and define all variables for which data will be sought (such as PICO items, funding sources), any pre-planned data assumptions and simplifications n/a                                                                                                                  |
| Outcomes and prioritization        | 13  | List and define all outcomes for which data will be sought, including prioritization of main and additional outcomes, with rationale <a href="#">Dimensions of interest are listed for this qualitative synthesis rather than measurable outcomes. (page 6)</a>              |
| Risk of bias in individual studies | 14  | Describe anticipated methods for assessing risk of bias of individual studies, including whether this will be done at the outcome or study level, or both; state how this information will be used in data synthesis <a href="#">Quality appraisal is described (page 9)</a> |
| Data synthesis                     | 15a | Describe criteria under which study data will be quantitatively synthesised n/a                                                                                                                                                                                              |
|                                    | 15b | If data are appropriate for quantitative synthesis, describe planned summary measures, methods of handling data and methods of combining data from studies, including any planned exploration of consistency (such as $I^2$ , Kendall's $\tau$ ) n/a                         |
|                                    | 15c | Describe any proposed additional analyses (such as sensitivity or subgroup analyses, meta-regression) n/a                                                                                                                                                                    |
|                                    | 15d | If quantitative synthesis is not appropriate, describe the type of summary planned ✓ (page 10)                                                                                                                                                                               |
| Meta-bias(es)                      | 16  | Specify any planned assessment of meta-bias(es) (such as publication bias across studies, selective reporting within studies) n/a                                                                                                                                            |
| Confidence in cumulative evidence  | 17  | Describe how the strength of the body of evidence will be assessed (such as GRADE) n/a                                                                                                                                                                                       |

**\* It is strongly recommended that this checklist be read in conjunction with the PRISMA-P Explanation and Elaboration (cite when available) for important clarification on the items. Amendments to a review protocol should be tracked and dated. The copyright for PRISMA-P (including checklist) is held by the PRISMA-P Group and is distributed under a Creative Commons Attribution Licence 4.0.**

*From: Shamseer L, Moher D, Clarke M, Ghersi D, Liberati A, Petticrew M, Shekelle P, Stewart L, PRISMA-P Group. Preferred reporting items for systematic review and meta-analysis protocols (PRISMA-P) 2015: elaboration and explanation. BMJ. 2015 Jan 2;349(jan02 1):g7647.*

# BMJ Open

## Experience of living with cancer and comorbid illness: protocol for a qualitative systematic review

|                                 |                                                                                                                                                                                                                                                                                                                                                                                                                        |
|---------------------------------|------------------------------------------------------------------------------------------------------------------------------------------------------------------------------------------------------------------------------------------------------------------------------------------------------------------------------------------------------------------------------------------------------------------------|
| Journal:                        | <i>BMJ Open</i>                                                                                                                                                                                                                                                                                                                                                                                                        |
| Manuscript ID                   | bmjopen-2016-013383.R2                                                                                                                                                                                                                                                                                                                                                                                                 |
| Article Type:                   | Protocol                                                                                                                                                                                                                                                                                                                                                                                                               |
| Date Submitted by the Author:   | 07-Dec-2016                                                                                                                                                                                                                                                                                                                                                                                                            |
| Complete List of Authors:       | Cavers, Debbie; University of Edinburgh, Centre for Population Health Sciences<br>CunninghamBurley, Sarah; University of Edinburgh, Public Health Sciences<br>Watson, Eila; Oxford Brookes University Faculty of Health and Life Sciences<br>Banks, Elspeth; NCRI Psychosocial Oncology and Survivorship Clinical Studies Group<br>Campbell, Christine; University of Edinburgh, Centre for Population Health Sciences |
| <b>Primary Subject Heading</b>: | Oncology                                                                                                                                                                                                                                                                                                                                                                                                               |
| Secondary Subject Heading:      | Qualitative research, Health services research, Patient-centred medicine, Sociology                                                                                                                                                                                                                                                                                                                                    |
| Keywords:                       | Cancer, Systematic review, Multimorbidity, Comorbidity, Qualitative synthesis                                                                                                                                                                                                                                                                                                                                          |
|                                 |                                                                                                                                                                                                                                                                                                                                                                                                                        |

SCHOLARONE™  
Manuscripts

Only

1  
2  
3 **Experience of living with cancer and comorbid illness: protocol for a qualitative systematic review**  
4  
5  
6  
7  
8  
9

10 Debbie Cavers, Sarah Cunningham-Burley, Eila Watson, Elspeth Banks, Christine Campbell  
11  
12

13  
14  
15 Author affiliations:  
16

17  
18 Debbie Cavers, CSO Research Fellow, University of Edinburgh, The Usher Institute of Population Health  
19  
20 Sciences and Informatics, Centre for Population Health Sciences, Medical School, Teviot Place, Edinburgh  
21  
22 EH8 9AG, UK.  
23

24 Sarah Cunningham-Burley, Professor of Medical and Family Sociology, University of Edinburgh, The Usher  
25  
26 Institute of Population Health Sciences and Informatics, Centre for Population Health Sciences, Medical  
27  
28 School, Teviot Place, Edinburgh EH8 9AG, UK.  
29

30 Eila Watson, Professor in Supportive Cancer Care, Oxford Brookes University, Faculty of Health and Life  
31  
32 Sciences, Jack Straws Lane, Marston, Oxford, OX3 0FL.  
33

34  
35 Elspeth Banks, Consumer Member, NCRI Psychosocial Oncology and Survivorship Clinical Studies Group,  
36  
37 Willowbank, Mill Road, Morningside, Wishaw, Lanarkshire, ML2 9QR.  
38

39 Christine Campbell, Senior Research Fellow, University of Edinburgh, The Usher Institute of Population  
40  
41 Health Sciences and Informatics, Centre for Population Health Sciences, Medical School, Teviot Place,  
42  
43 Edinburgh EH8 9AG, UK.  
44

45  
46  
47  
48 Correspondence to:

49  
50 Dr Debbie Cavers, [Debbie.Cavers@ed.ac.uk](mailto:Debbie.Cavers@ed.ac.uk)  
51  
52  
53  
54  
55  
56  
57  
58  
59  
60



**ABSTRACT**

Introduction: There is an increasing number of people living with and beyond cancer, whose experience is further complicated by additional long term health conditions in the context of an ageing population. The supportive care needs of this growing patient group should be recognised and addressed. There is a need to explore the experience of living with cancer and comorbid illness in order to develop optimal models of patient-centred care. This protocol describes a systematic review which aims to identify the qualitative evidence relating to the experience of cancer and comorbid illness for patients, informal carers and professionals, and to highlight areas where more research is needed.

Methods and Analysis: A systematic review following PRISMA guidance will be undertaken. Medline, Embase, CINAHL, PsycINFO, ASSIA, Sociological Abstracts, Web of Science, SCOPUS, OpenGrey and ProQuest Dissertations and Theses Global databases will be systematically searched for articles relevant to patient, carer and professional experiences. Two independent reviewers will screen articles for inclusion and evaluate them according to the Critical Appraisal Skills Programme (CASP) tool. Extracted data will be combined using recognised methods of qualitative synthesis to offer new insights into the topic area and for a patient-centred model of care.

Ethics and dissemination: The review does not require formal ethical review as no direct patient contact or patient identifiable data is used. Conduct of the review has been approved internally by the University of Edinburgh Centre for Population Health Sciences Ethics Review Committee. Results of the review will be published in a generalist peer-reviewed journal and presented at a relevant conference in addition to informing subsequent empirical work by the authors on this topic area.

**Strengths and limitations of this study:**

- Protocol for a systematic review of current literature exploring a highly important topic presenting a current challenge to health care provision
- Using robust methodology following standardised guidelines
- Scope to inform policy and practice and improve patient care
- Systematic review of qualitative empirical evidence only; does not cover quantitative studies or existing systematic reviews but can give important insights.
- Large evidence base for experience of cancer and experience of multi-morbidity, but little linking the two bodies of evidence, presenting a challenge to the reviewers.

## INTRODUCTION

Due to the ageing population and better screening, diagnosis and treatments, there are an increasing number of people living with and beyond cancer (1). The lived experience of these individuals is often complicated by the presence of other comorbid chronic illnesses; as many as 78% of cancer patients are living with at least one other condition, the prevalence of which also increase with age (2, 3). Therefore, the support needs of people living with multiple complex conditions are enduring and need to be identified and addressed (4). In addition to the challenges facing secondary care (5), there is increasing recognition of the role of primary care in the provision of ongoing support to cancer patients, particularly after the completion of hospital-based treatment as patients adjust to life post treatment, living with ongoing medical issues related to their cancer treatment (6, 7). This picture becomes more complex in the presence of other long term conditions, with implications for the coordination of quality care and support (8, 9).

Meeting the needs of people living beyond cancer has been identified as a policy priority (10), which informed the development of the National Cancer Survivorship Initiative (6) in England and Wales; survivorship also forms part of the remit for Scotland's Better Cancer Care (11). In many cases survivorship initiatives and research target the clinical needs related to long term side effects (12). However, psychosocial support for survivors of cancer is another important consideration and has implications for the role of primary, secondary and community care. While valuable research has been conducted to understand better these dimensions of life for the patient, and their relatives (13-17), less is known about the impact of additional chronic illness on patients' lived experience. As such, service development and provision would benefit from further in-depth research in this area (7, 18). Understanding the challenges experienced by people living after a cancer diagnosis with other chronic conditions such as COPD, diabetes or mental ill health, can give new insights into patient-centred models of care.

### Objectives

While addressing the holistic needs of cancer survivors form part of the vision of survivorship initiatives, and there is growing body of work exploring experience of multi-morbidity (19), there is a dearth of research

1  
2  
3 linking cancer with comorbid disease to further enrich our understanding of living with such complex illness.  
4  
5 This systematic review aims to synthesise and report on published evidence exploring the experience of  
6  
7 cancer survivorship in connection with that of other long term conditions in order to identify critical research  
8  
9 questions. The findings from the review will combine with those from a separate patient-centred research  
10  
11 prioritisation exercise to set a qualitative empirical research agenda for future work.  
12  
13

14 *Research questions:*

- 15
- 16
- 17 • What are the findings of qualitative evidence exploring the *experience* of living with both cancer and
- 18 one or more comorbidities from patient, carer and provider perspectives?
- 19
- 20
- 21 • What are the psychosocial support needs of people living with cancer and one or more other long
- 22 term condition(s) identified in the literature?
- 23
- 24
- 25 • What are patient, carer and provider experiences of service provision reported in the literature?
- 26
- 27
- 28 • What research priorities can be derived from the available evidence?
- 29
- 30

31 **REVIEW METHODS**

32  
33  
34 *Design*

35  
36 A systematic review of the current evidence linking experience of cancer with comorbid illness is considered  
37  
38 a robust way of identifying and synthesising the published evidence in this area to define a cohesive  
39  
40 empirical research agenda that builds on prior knowledge (20). The review will include qualitative evidence  
41  
42 only to produce an interpretation built on people's views and experiences; acknowledging the rich context  
43  
44 and different dimensions of the lived experience from the perspective of those experiencing it. Further, a  
45  
46 synthesis of qualitative data aims to generate findings that are meaningful, relevant and appropriate to  
47  
48 individuals, to inform a qualitative research agenda, and ultimately to more effectively influence policy and  
49  
50 practice influencing patient outcomes (21).  
51  
52

53  
54 The review is based on the PRISMA statement guidance for conducting a systematic review (22), and the  
55  
56 protocol follows the relevant items on the PRISMA-P checklist (23). The review protocol has been registered  
57  
58

1  
2  
3 on the International Prospective Register of Systematic Reviews (PROSPERO) database (registration number:  
4  
5 CRD42016041796).  
6

7  
8 The review will use methods of qualitative synthesis to combine, integrate and interpret, where possible, the  
9  
10 evidence from the included papers (see eligibility and data synthesis sections below)(21, 24). The review  
11  
12 aims to move beyond the aggregation of available data to provide further interpretive insights into living  
13  
14 with complex illness and define where future research can add to what is known (24).  
15  
16

17  
18 No formal ethical approval is required for this study as it will not include patient identifiable data. It has been  
19  
20 internally approved by the University of Edinburgh Centre for Population Health Sciences Ethics Review  
21  
22 Committee (Ref: 8/03/2016).  
23

#### 24 *Eligibility criteria*

25  
26 The review will include qualitative empirical studies, including unpublished grey literature. Qualitative data  
27  
28 from mixed methods studies will be screened for inclusion and included if the qualitative component is  
29  
30 relevant. Included articles will be published between 2000 and the present day to ensure the currency of the  
31  
32 work while enabling a broad view of developing issues to be identified. Articles will be included that address  
33  
34 the lived experience of the cancer journey with attention to existing long term health conditions (developed  
35  
36 before or after the cancer diagnosis), and will identify issues related to psychosocial and supportive care as  
37  
38 outlined in relation to the anticipated dimensions of interest. Articles will be included from across the cancer  
39  
40 continuum from diagnosis through to end of life and will include the perspectives of adult patients (aged 18  
41  
42 or over), informal carers and health care professionals. The review will include only articles published in  
43  
44 English.  
45  
46

47  
48 Studies will be included for any cancer type in combination with one or more comorbid long term condition  
49  
50 (LTC), also described as cancer multi-morbidity. Long term conditions to be included will be guided by those  
51  
52 listed in Barnett et al's paper mapping the epidemiology of multi-morbidity (3) (See Appendix 1 for a full list  
53  
54 of conditions). The applied definition of long term conditions is based on ISD Scotland's report on important  
55  
56 long term conditions in Scotland; the report uses, among others, the Long Term Conditions Collaborative to  
57  
58

1  
2  
3 define an LTC as, 'one that requires ongoing care, limits what one can do and is likely to last longer than a  
4  
5 year'(25). Long term side effects of cancer treatment and second primary cancers are not included;  
6  
7 experience of second primary cancers is being addressed separately within the research centre. Where it is  
8  
9 not possible to determine whether the condition is caused by cancer treatment, the article will be included  
10  
11 in the review but analysed separately.  
12

### 13 *Dimensions of interest*

14  
15 The review focuses on an exploration of the dimensions of lived experience: physical, social, emotional and  
16  
17 psychological. From a similar study exploring multiple dimensions of experience, these are expected to  
18  
19 include such topics as quality of life, well-being, psychosocial supportive care needs, attitude and identity,  
20  
21 perceived continuity and quality of care, and influence of personal demographics (age, gender, ethnicity,  
22  
23 socio-economic status) (26). In relation to how services can best meet patients' needs, topics may include  
24  
25 issues of accessing appropriate services, coordination of care for multiple conditions, and self-management  
26  
27 across the cancer care continuum (17, 19) . The search strategy has been developed to reflect these broad  
28  
29 and exploratory domains. The outcomes will depend on the evidence available and gaps in the evidence will  
30  
31 be highlighted for future study.  
32  
33  
34

### 35 *Information sources*

36  
37 A variety of search strategies will be used to identify potential literature for the review, particularly given  
38  
39 the challenges in identifying qualitative evidence (27). This will primarily involve a literature database search  
40  
41 (including grey literature), but will also include citation and snowball searching, known expert consultation  
42  
43 via email, related articles searches in PubMed and use of Google scholar. The databases to be consulted are:  
44  
45 Medline, Embase, CINAHL, PsycINFO, ASSIA, Sociological Abstracts, Web of Science, SCOPUS and, for grey  
46  
47 literature, OpenGrey and ProQuest Dissertations and Theses Global. These are considered sufficient to  
48  
49 comprehensively cover the range of topics and disciplines implicated in this review.  
50  
51  
52  
53  
54  
55  
56  
57  
58  
59  
60

### Search strategy

The searching phase aims to identify relevant studies for inclusion in the review. The process of searching will begin with individually searching each of the listed databases using an adapted list of search terms; the developed search strategy for Medline is shown in Box 1. The search terms will be adapted to suit each database to derive the most meaningful search and will use free text, MeSH and subject headings for maximum sensitivity and specificity.

#### Box 1: Example search strategy for Medline

1. Comorbidity/
2. (Multimorbid\$ or multi-morbid\$ or Co-morbid\$).mp. [mp=title, abstract, original title, name of substance word, subject heading word, keyword heading word, protocol supplementary concept word, rare disease supplementary concept word, unique identifier]
3. Chronic Disease/ or (Chronic adj5 (illness\$ or condition\$ or disease)).tw.
4. (Long term adj5 (condition\$ or illness\$ or disease\$)).mp. [mp=title, abstract, original title, name of substance word, subject heading word, keyword heading word, protocol supplementary concept word, rare disease supplementary concept word, unique identifier]
5. 1 or 2 or 3 or 4
6. Neoplasms/ or Cancer.mp or (Tumour or tumor or Oncology or Neoplasm).mp. [mp=title, abstract, original title, name of substance word, subject heading word, keyword heading word, protocol supplementary concept word, rare disease supplementary concept word, unique identifier]
7. Qualitative Research/ or Qualitative.mp or Interview/ r Interview\$.mp or In-depth.mp
8. (Focus Group or or Ethnograph\$ or Observation\$ or Participant\$ or Respondent\$ or View\$ or Belief\$ or Attitude\$ or Awareness or Perspective\$ or Understanding\$ or Findings or Grounded Theory or Social Construction\$ or Theoretical or Phenomenolog\$).mp. [mp=title, abstract, original title, name of substance word, subject heading word, keyword heading word, protocol supplementary concept word, rare disease supplementary concept word, unique identifier]
9. 7 or 8
10. Psychosocial.mp. or Stress, Psychological/ or Social Support/ or Psycho-social.mp or "Quality of Life"/ or "Experience of Illness".mp or Experience adj5 Illness or Attitude to Health/ or "Quality of Life".mp or Happ\$.mp or Emotion\$.mp. or Emotions/
11. Patient satisfaction.mp. or Patient Satisfaction/ or "Quality of Health Care"/ or "Patient Experience".mp or Satisfaction.mp or "Information Preferences".mp or Decision Making/ or (Decision-making or Decision Making).mp or (Informed choice or Informed Decision Making).mp or Self management.mp. or Self Care/ or "Continuity of Patient Care"/ or Integrated care.mp
12. Access to Health Care.mp. or Health Services Accessibility/
13. Identity.mp. or gender.mp. or Gender Identity/
14. (Health behaviour or Health behavior).mp.
15. (Help-seeking or Help seeking).mp.
16. (Well-being or Well being).mp. or Holistic.mp or Continuity of Care.mp or "Continuity of Patient Care"/ or (Fragmented adj5 care).mp or (joined-up or Joined Up).mp or Integrated care.mp or Diversity of Care.mp.
17. Primary care.mp. or Primary Health Care/ or Secondary care.mp. or Secondary Care/ or Community Care.mp or Community Health Services/ or Ambulatory Care.mp. or Ambulatory Care/ or "Delivery of Health Care, Integrated"/ or Preventive Health Services/ or Family Practice/ or Shared care.mp or Collaborat\$ care.mp

1  
2  
3  
4 18. (Patient-centred care or Patient centred care or Patient-centred or Person-centred or Patient centred or Person  
5 centred).mp or Patient-Centered Care/

6 19. Palliative Care/ or Supportive care.mp. or palliative.mp.

7  
8 20. "Health Services Needs and Demand"/ or unmet need.mp. or Health Services Research/ or Depriv\$.mp. or (Socio-  
9 economic or Socioeconomic).mp. or Information needs.mp.

10 21. Survivor\$.mp. or Survivors/

11 22. Patient Care Planning/ or Care plan.mp. or (Follow-up or Follow up).mp.

12 23. ("use of service\$" or "service use" or "service adj5 use").mp.

13 24. 10 or 11 or 12 or 13 or 14 or 15 or 16 or 17 or 18 or 19 or 20 or 21 or 22 or 23

14 25. 5 AND 6 AND 9 AND 24  
15  
16

17  
18  
19  
20 **DATA COLLECTION AND ANALYSIS**

21 *Study records*

22 Identified records will be imported into and managed in EndNoteX7. Screened and selected articles will be  
23 managed in subsequent EndNote databases in order to track and record the number of records retained at  
24 each step. It is anticipated that given the relative lack of attention in the literature specifically examining the  
25 experience of long term conditions as a cancer survivor, the review will produce a small number of relevant  
26 but heterogeneous studies.  
27  
28  
29  
30  
31  
32  
33

34  
35 *Screening*

36 Screening of articles will adhere to the specified inclusion criteria (as detailed above; also see Box 2).  
37  
38  
39

40 **Box 2: Inclusion and exclusion criteria**

41  
42  
43  
44 **Inclusion criteria:**

- 45 • Study population – Adults (over 18) with a diagnosis of cancer and at least one other
- 46 LTC (as specified in appendix 1), carers and health professionals
- 47 • Articles relating to experience of illness from patient, carer and professional
- 48 perspectives
- 49 • Articles focusing on areas denoted in the dimensions of interest
- 50 • Studies with a qualitative empirical design
- 51 • Articles published in English

52  
53  
54  
55 **Exclusion criteria:**

- 56 • Articles not meeting the above inclusion criterion.
- 57 • Articles published before 2000
- 58 • Articles focusing on long term side effects of cancer treatment or second primary
- 59 cancers alone.



1  
2  
3  
4  
5  
6  
7  
8  
9  
10  
11 A three-step screening process will be undertaken to achieve the final set of included articles. Firstly, all *titles*  
12 will be read and those of no obvious relevance will be excluded. This process will be undertaken by the  
13 primary reviewer DC. Secondly, *abstract screening* will be undertaken by DC and another reviewer to look in  
14 more detail for relevance and fit with the inclusion criteria. Any differences in judgement will be resolved by  
15 a third reviewer. Finally, *full text* articles of remaining studies will be obtained and read, again by DC and one  
16 other reviewer, to assess their suitability for inclusion in the final review. Full text articles deemed to meet  
17 the inclusion criteria will be selected and subject to quality appraisal and data extraction.  
18  
19  
20  
21  
22  
23  
24  
25  
26

#### 27 *Data extraction*

28  
29 Data extraction will be managed in Microsoft Excel using a purpose designed proforma. Extracted material  
30 will reflect the inclusion criteria and the designated aims of the review, derived from the article as a whole.  
31 Information will be gathered on: author; year of publication; country of study; study type; setting; relevant  
32 background and impetus for the study; methodological approach and specified methods; patient  
33 characteristics and demographics including cancer and comorbidity type; main findings including pertinent  
34 themes relating to experience of illness, psychosocial needs and supportive care; strengths and limitations;  
35 and key relevant discussion points. Extraction of data will be carried out by DC and the second reviewer.  
36  
37  
38  
39  
40  
41  
42  
43  
44

#### 45 *Quality assessment*

46  
47 All included articles will be subject to critical appraisal using the Critical Appraisal Skills Programme (CASP)  
48 tool. The 10-item CASP tool was considered to be the most suitable tool to consider the quality parameters  
49 of qualitative work and is a well validated and accepted tool. In reference to the debate on exclusion of  
50 qualitative articles on the basis of quality, no articles will be excluded on these grounds alone and a low  
51 threshold for inclusion will be applied so that the review can benefit from researcher insight and theoretical  
52  
53  
54  
55  
56  
57  
58

1  
2  
3 as well as empirical contributions (28-30). The relative quality of included studies will be critically considered  
4  
5 during the analysis and in reference to the developed synthesis. Quality assessment will be undertaken by  
6  
7 two independent reviewers and any differences of opinion will be discussed and reviewed by a third person  
8  
9 if no consensus is reached.  
10

### 11 12 *Data synthesis*

13  
14 For a qualitative review seeking to explore personal lived experiences, it was important to find a method  
15  
16 that acknowledges the different paradigms and positions upon which each research output is based as well  
17  
18 as allowing for different study methods covering a broad and exploratory topic area (31). Meta-ethnography,  
19  
20 used originally in education research by Noblit and Hare but has more recently been of interest in nursing  
21  
22 and health services research (32-34), was considered as an appropriate method for this purpose as it is  
23  
24 suited to reviewing a small body of exclusively qualitative evidence and gives rise to a meaningful  
25  
26 interpretive account rather than simply aggregating the data (32, 35, 36). However, thematic synthesis,  
27  
28 developed by Thomas and Harden, was also considered as it provides a prescriptive approach that lends  
29  
30 itself well to transparency and quality in the conduct and reporting of the review, and in generating  
31  
32 hypotheses to meet the review's objective of generating further empirical research questions (21, 24). Like  
33  
34 meta-ethnography, this method encourages the researcher to consider the concepts and themes that relate  
35  
36 different studies - through line by line coding, developing descriptive themes and generating analytic themes  
37  
38 - to provide a mutual translation and ultimately produce an interpretive account of the phenomenon of  
39  
40 interest, as a grounded theory approach aims to do with primary data analysis (37, 38).  
41  
42  
43  
44

45  
46 Given the anticipated yield of a small heterogeneous body of evidence meeting the eligibility criteria for the  
47  
48 review, a narrative-based summary may be more appropriate and achievable using steps one and two of  
49  
50 Thomas and Harden's thematic synthesis (21). Extracted data will be combined and described using the most  
51  
52 appropriate method to reflect the evidence available. Where possible, an interpretive account of the data  
53  
54 will be presented in the context of a critical review of the evidence. The descriptive or conceptual outputs  
55  
56 will be related to the research questions and objectives.  
57  
58

## DISCUSSION

Insights from the proposed review will contribute to what is known, giving novel attention to the combination of cancer with other long term chronic conditions. This is considered a necessary step in cancer survivorship research and care in the face of the increasing, ageing population and the shifting emphasis in patient care.

Building on the knowledge base will contribute to an evidence-based and conceptually informed integrated model of care, with an emphasis on better understanding experiences of complex and multiple conditions and the implications for living with cancer and comorbid illness in the push towards shared care or self-management (39).

While conceptual and theoretical insights to a subject area can add richness to the academic evidence base, it is important to produce a robust qualitative synthesis that reflects the identified evidence (24). A narrative summary can adequately meet the proposed objectives, provide answers to the research questions and speak meaningfully to policy directives.

The findings from the review will combine with patient engagement work by the authors to inform an empirical study exploring the needs of the defined patient group and the development of an intervention to better address their complex needs. The review will be published in a peer-reviewed journal and presented at a relevant conference in addition to being shared with local interest groups and via online social media.

*Acknowledgements:* Thanks to Ms Marshall Dozier, Academic Liaison Librarian, for advice on designing the review and searching literature databases and to Dr Karen Barnett for advice on defining included long term conditions.

*Authors' contributions:* DC designed the systematic review with input from CC, SCB, EW and EB. DC drafted the review protocol with input from CC, SCB, EW and EB. DC is guarantor of the review.

1  
2  
3  
4  
5  
6  
7  
8  
9  
10  
11  
12  
13  
14  
15  
16  
17  
18  
19  
20  
21  
22  
23  
24  
25  
26  
27  
28  
29  
30  
31  
32  
33  
34  
35  
36  
37  
38  
39  
40  
41  
42  
43  
44  
45  
46  
47  
48  
49  
50  
51  
52  
53  
54  
55  
56  
57  
58  
59  
60

*Funding:* This review has been funded by the Scottish Government’s Chief Scientist Office (CSO); funding reference number: PDF/15/06. The CSO have provided financial support as part of a personal fellowship but are not involved in other aspect of the study design, implementation or analysis.

*Competing interests:* None declared

For peer review only

## REFERENCES

1. Information Services Division. Cancer In Scotland. 2014.
2. McLean G, Gunn J, Wyke S, Guthrie B, Watt GC, Blane DN, et al. The influence of socioeconomic deprivation on multimorbidity at different ages: a cross-sectional study. *The British journal of general practice : the journal of the Royal College of General Practitioners*. 2014;64(624):e440-7.
3. Barnett K, Mercer SW, Norbury M, Watt G, Wyke S, Guthrie B. Epidemiology of multimorbidity and implications for health care, research, and medical education: a cross-sectional study. *Lancet (London, England)*. 2012;380(9836):37-43.
4. Mason B, Nanton V, Epiphaniou E, Murray SA, Donaldson A, Shipman C, et al. 'My body's falling apart.' Understanding the experiences of patients with advanced multimorbidity to improve care: serial interviews with patients and carers. *BMJ supportive & palliative care*. 2014.
5. Smith SM, Allwright S, O'Dowd T. Does sharing care across the primary-specialty interface improve outcomes in chronic disease? A systematic review. *The American journal of managed care*. 2008;14(4):213-24.
6. NHS Health Improvement and Macmillan Cancer Support. National Cancer Survivorship Initiative: Vision. 2010.
7. Smith SM, Soubhi H, Fortin M, Hudon C, O'Dowd T. Managing patients with multimorbidity: systematic review of interventions in primary care and community settings. *BMJ (Clinical research ed)*. 2012;345:e5205.
8. Snyder CF, Frick KD, Herbert RJ, Blackford AL, Neville BA, Lemke KW, et al. Comorbid condition care quality in cancer survivors: role of primary care and specialty providers and care coordination. *Journal of cancer survivorship : research and practice*. 2015;9(4):641-9.
9. Williams GR, Mackenzie A, Magnuson A, Olin R, Chapman A, Mohile S, et al. Comorbidity in older adults with cancer. *Journal of geriatric oncology*. 2015.
10. Department of Health. Cancer Reform Strategy. 2007.
11. Scottish Government. Better Cancer Care: An Action Plan. 2008.
12. Adams E, Hill E, Watson E. Fertility preservation in cancer survivors: a national survey of oncologists' current knowledge, practice and attitudes. *British journal of cancer*. 2013;108(8):1602-15.
13. Harrison SE, Watson EK, Ward AM, Khan NF, Turner D, Adams E, et al. Primary health and supportive care needs of long-term cancer survivors: a questionnaire survey. *Journal of clinical oncology : official journal of the American Society of Clinical Oncology*. 2011;29(15):2091-8.
14. Adams E, Boulton M, Rose PW, Lund S, Richardson A, Wilson S, et al. A qualitative study exploring the experience of the partners of cancer survivors and their views on the role of primary care. *Supportive care in cancer : official journal of the Multinational Association of Supportive Care in Cancer*. 2012;20(11):2785-94.
15. Watson EK, Rose PW, Loftus R, Devane C. Cancer survivorship: the impact on primary care. *The British journal of general practice : the journal of the Royal College of General Practitioners*. 2011;61(592):e763-5.
16. Watson EK, O'Brien R, Campbell C, Weller D, Neal RD, Wilkinson C, et al. Views of health professionals on the role of primary care in the follow-up of men with prostate cancer. *Family practice*. 2011;28(6):647-54.
17. O'Brien R, Wyke S, Guthrie B, Watt G, Mercer S. An 'endless struggle': a qualitative study of general practitioners' and practice nurses' experiences of managing multimorbidity in socio-economically deprived areas of Scotland. *Chronic illness*. 2011;7(1):45-59.
18. France EF, Wyke S, Gunn JM, Mair FS, McLean G, Mercer SW. Multimorbidity in primary care: a systematic review of prospective cohort studies. *The British journal of general practice : the journal of the Royal College of General Practitioners*. 2012;62(597):e297-307.

19. Coventry PA, Small N, Panagioti M, Adeyemi I, Bee P. Living with complexity; marshalling resources: a systematic review and qualitative meta-synthesis of lived experience of mental and physical multimorbidity. *BMC family practice*. 2015;16(1):171.
20. Hemingway P, Brereton N. What is a systematic review? . What is? series2009.
21. Thomas J, Harden A. Methods for the thematic synthesis of qualitative research in systematic reviews. *BMC medical research methodology*. 2008;8:45.
22. Moher D, Liberati A, Tetzlaff J, Altman DG. Preferred reporting items for systematic reviews and meta-analyses: the PRISMA statement. *PLoS medicine*. 2009;6(7):e1000097.
23. Moher D, Shamseer L, Clarke M, Ghersi D, Liberati A, Petticrew M, et al. Preferred reporting items for systematic review and meta-analysis protocols (PRISMA-P) 2015 statement. *Systematic reviews*. 2015;4:1.
24. Barnett-Page E, Thomas J. Methods for the synthesis of qualitative research: a critical review. *BMC medical research methodology*. 2009;9:59.
25. Information Services Division. Measuring Long Term Conditions in Scotland. NHS National Services Scotland, 2008 June Report No.
26. Cavers D, Hacking B, Erridge SC, Morris PG, Kendall M, Murray SA. Adjustment and support needs of glioma patients and their relatives: serial interviews. *Psycho-oncology*. 2013;22(6):1299-305.
27. Shaw RL, Booth A, Sutton AJ, Miller T, Smith JA, Young B, et al. Finding qualitative research: an evaluation of search strategies. *BMC medical research methodology*. 2004;4:5.
28. Mays N, Pope C. Qualitative research in health care. Assessing quality in qualitative research. *BMJ (Clinical research ed)*. 2000;320(7226):50-2.
29. Dixon-Woods M, Shaw RL, Agarwal S, Smith JA. The problem of appraising qualitative research. *Quality & safety in health care*. 2004;13(3):223-5.
30. Petticrew M, Roberts H. *Systematic Reviews in the Social Sciences: a Practical Guide*: Blackwell Publishing; 2006.
31. Dixon-Woods M, Fitzpatrick R. Qualitative research in systematic reviews. *BMJ (Clinical research ed)*. 2001;323:765.
32. Dixon-Woods M, Cavers D, Agarwal S, Annandale E, Arthur A, Harvey J, et al. Conducting a critical interpretive synthesis of the literature on access to healthcare by vulnerable groups. *BMC medical research methodology*. 2006;6:35.
33. Lang H, France E, Williams B, Humphris G, Wells M. The psychological experience of living with head and neck cancer: a systematic review and meta-synthesis. *Psycho-oncology*. 2013;22(12):2648-63.
34. Britten N, Campbell R, Pope C, Donovan J, Morgan M, Pill R. Using meta ethnography to synthesise qualitative research: a worked example. *J Health Serv Res Pol*. 2002;7.
35. Noblit G, Hare R. *Meta-Ethnography: Synthesising Qualitative Studies*: SAGE Publications; 1988.
36. Campbell R, Pound P, Morgan M, Daker-White G, Britten N, Pill R, et al. *Evaluating meta-ethnography: systematic analysis and synthesis of qualitative research*2011.
37. Glaser B, Strauss A. *The Discovery of Grounded Theory: strategies for qualitative research*: Sociology Press; 1967.
38. Charmaz K. *Constructing Grounded Theory: A Practical Guide through Qualitative Analysis*. 2nd ed: SAGE; 2013.
39. Coffey L, Mooney O, Dunne S, Sharp L, Timmons A, Desmond D, et al. Cancer survivors' perspectives on adjustment-focused self-management interventions: a qualitative meta-synthesis. *Journal of cancer survivorship : research and practice*. 2016.

## Appendix 1: List of Long Term Conditions

Hypertension  
Depression  
Painful condition  
Asthma  
Coronary Heart Disease  
Dyspepsia  
Diabetes  
Thyroid Disorders  
Rheumatoid arthritis, other inflammatory polyarthropathies and systemic connective tissue disorders  
Hearing loss  
Chronic Obstructive Pulmonary Disease  
Anxiety and other neurotic, stress-related and somatoform disorders  
Irritable Bowel Syndrome  
Cancer  
Alcohol Problems  
Other psychoactive substance misuse  
Constipation  
Stroke or transient ischaemic attack  
Chronic kidney disease  
Diverticular disease of intestine  
Atrial fibrillation  
Peripheral vascular disease  
Heart failure  
Prostate disorders  
Glaucoma  
Epilepsy  
Dementia  
Schizophrenia  
Psoriasis or eczema  
Inflammatory bowel disease  
Migraine  
Blindness and low vision  
Chronic sinusitis  
Learning disability  
Anorexia or bulimia  
Bronchiectasis  
Parkinson's disease  
Multiple Sclerosis  
Viral hepatitis  
Chronic liver disease

**Source:** Adapted from: Barnett K, Mercer SW, Norbury M, Watt G, Wyke S, Guthrie B. Epidemiology of multimorbidity and implications for health care, research, and medical education: a cross-sectional study. *Lancet*, 2012;380(9836):37-43.

**PRISMA-P (Preferred Reporting Items for Systematic review and Meta-Analysis Protocols) 2015 checklist: recommended items to address in a systematic review protocol\***

| Section and topic                 | Item No | Checklist item                                                                                                                                                                                                                           |
|-----------------------------------|---------|------------------------------------------------------------------------------------------------------------------------------------------------------------------------------------------------------------------------------------------|
| <b>ADMINISTRATIVE INFORMATION</b> |         |                                                                                                                                                                                                                                          |
| Title:                            |         |                                                                                                                                                                                                                                          |
| Identification                    | 1a      | Identify the report as a protocol of a systematic review ✓ (title page, main document)                                                                                                                                                   |
| Update                            | 1b      | If the protocol is for an update of a previous systematic review, identify as such n/a                                                                                                                                                   |
| Registration                      | 2       | If registered, provide the name of the registry (such as PROSPERO) and registration number PROSPERO registration number: CRD42016041796 (page 5, main document)                                                                          |
| Authors:                          |         |                                                                                                                                                                                                                                          |
| Contact                           | 3a      | Provide name, institutional affiliation, e-mail address of all protocol authors; provide physical mailing address of corresponding author ✓ (title page)                                                                                 |
| Contributions                     | 3b      | Describe contributions of protocol authors and identify the guarantor of the review ✓ (page 11)                                                                                                                                          |
| Amendments                        | 4       | If the protocol represents an amendment of a previously completed or published protocol, identify as such and list changes; otherwise, state plan for documenting important protocol amendments n/a                                      |
| Support:                          |         |                                                                                                                                                                                                                                          |
| Sources                           | 5a      | Indicate sources of financial or other support for the review ✓ (page 12)                                                                                                                                                                |
| Sponsor                           | 5b      | Provide name for the review funder and/or sponsor ✓ (page 12)                                                                                                                                                                            |
| Role of sponsor or funder         | 5c      | Describe roles of funder(s), sponsor(s), and/or institution(s), if any, in developing the protocol ✓ (page 12)                                                                                                                           |
| <b>INTRODUCTION</b>               |         |                                                                                                                                                                                                                                          |
| Rationale                         | 6       | Describe the rationale for the review in the context of what is already known ✓ (page 3, introduction)                                                                                                                                   |
| Objectives                        | 7       | Provide an explicit statement of the question(s) the review will address with reference to participants, interventions, comparators, and outcomes (PICO) ✓ (page 4, objectives)                                                          |
| <b>METHODS</b>                    |         |                                                                                                                                                                                                                                          |
| Eligibility criteria              | 8       | Specify the study characteristics (such as PICO, study design, setting, time frame) and report characteristics (such as years considered, language, publication status) to be used as criteria for eligibility for the review ✓ (page 5) |
| Information sources               | 9       | Describe all intended information sources (such as electronic databases, contact with study authors, trial registers or other                                                                                                            |



|                                    |     |                                                                                                                                                                                                                                                                              |
|------------------------------------|-----|------------------------------------------------------------------------------------------------------------------------------------------------------------------------------------------------------------------------------------------------------------------------------|
|                                    |     | grey literature sources) with planned dates of coverage ✓ (page 6)                                                                                                                                                                                                           |
| Search strategy                    | 10  | Present draft of search strategy to be used for at least one electronic database, including planned limits, such that it could be repeated ✓ (page 6-8)                                                                                                                      |
| Study records:                     |     |                                                                                                                                                                                                                                                                              |
| Data management                    | 11a | Describe the mechanism(s) that will be used to manage records and data throughout the review ✓ (page 8)                                                                                                                                                                      |
| Selection process                  | 11b | State the process that will be used for selecting studies (such as two independent reviewers) through each phase of the review (that is, screening, eligibility and inclusion in meta-analysis) ✓ (page 9)                                                                   |
| Data collection process            | 11c | Describe planned method of extracting data from reports (such as piloting forms, done independently, in duplicate), any processes for obtaining and confirming data from investigators ✓ (page 9)                                                                            |
| Data items                         | 12  | List and define all variables for which data will be sought (such as PICO items, funding sources), any pre-planned data assumptions and simplifications n/a                                                                                                                  |
| Outcomes and prioritization        | 13  | List and define all outcomes for which data will be sought, including prioritization of main and additional outcomes, with rationale <a href="#">Dimensions of interest are listed for this qualitative synthesis rather than measurable outcomes. (page 6)</a>              |
| Risk of bias in individual studies | 14  | Describe anticipated methods for assessing risk of bias of individual studies, including whether this will be done at the outcome or study level, or both; state how this information will be used in data synthesis <a href="#">Quality appraisal is described (page 9)</a> |
| Data synthesis                     | 15a | Describe criteria under which study data will be quantitatively synthesised n/a                                                                                                                                                                                              |
|                                    | 15b | If data are appropriate for quantitative synthesis, describe planned summary measures, methods of handling data and methods of combining data from studies, including any planned exploration of consistency (such as $I^2$ , Kendall's $\tau$ ) n/a                         |
|                                    | 15c | Describe any proposed additional analyses (such as sensitivity or subgroup analyses, meta-regression) n/a                                                                                                                                                                    |
|                                    | 15d | If quantitative synthesis is not appropriate, describe the type of summary planned ✓ (page 10)                                                                                                                                                                               |
| Meta-bias(es)                      | 16  | Specify any planned assessment of meta-bias(es) (such as publication bias across studies, selective reporting within studies) n/a                                                                                                                                            |
| Confidence in cumulative evidence  | 17  | Describe how the strength of the body of evidence will be assessed (such as GRADE) n/a                                                                                                                                                                                       |

**\* It is strongly recommended that this checklist be read in conjunction with the PRISMA-P Explanation and Elaboration (cite when available) for important clarification on the items. Amendments to a review protocol should be tracked and dated. The copyright for PRISMA-P (including checklist) is held by the PRISMA-P Group and is distributed under a Creative Commons Attribution Licence 4.0.**

*From: Shamseer L, Moher D, Clarke M, Ghersi D, Liberati A, Petticrew M, Shekelle P, Stewart L, PRISMA-P Group. Preferred reporting items for systematic review and meta-analysis protocols (PRISMA-P) 2015: elaboration and explanation. BMJ. 2015 Jan 2;349(jan02 1):g7647.*
