# Supplementary material for: Experience of living with cancer and comorbid illness: protocol for a qualitative systematic review
Source: PubMed Central journal article supplement — BMJ Open. 2017 May 9;7(5):e013383. doi: 10.1136/bmjopen-2016-013383 (PMC5623351; doi:10.1136/bmjopen-2016-013383), 2017-05-09
Supplement: bmjopen-2016-013383supp001.pdf [file bmjopen-2016-013383supp001.pdf]

## Appendix 1: List of Long Term Conditions

Hypertension  
Depression  
Painful condition  
Asthma  
Coronary Heart Disease  
Dyspepsia  
Diabetes  
Thyroid Disorders  
Rheumatoid arthritis, other inflammatory polyarthropathies and systemic connective tissue disorders  
Hearing loss  
Chronic Obstructive Pulmonary Disease  
Anxiety and other neurotic, stress-related and somatoform disorders  
Irritable Bowel Syndrome  
Cancer  
Alcohol Problems  
Other psychoactive substance misuse  
Constipation  
Stroke or transient ischaemic attack  
Chronic kidney disease  
Diverticular disease of intestine  
Atrial fibrillation  
Peripheral vascular disease  
Heart failure  
Prostate disorders  
Glaucoma  
Epilepsy  
Dementia  
Schizophrenia  
Psoriasis or eczema  
Inflammatory bowel disease  
Migraine  
Blindness and low vision  
Chronic sinusitis  
Learning disability  
Anorexia or bulimia  
Bronchiectasis  
Parkinson's disease  
Multiple Sclerosis  
Viral hepatitis  
Chronic liver disease

**Source:** Adapted from: Barnett K, Mercer SW, Norbury M, Watt G, Wyke S, Guthrie B. Epidemiology of multimorbidity and implications for health care, research, and medical education: a cross-sectional study. *Lancet*, 2012;380(9836):37-43.
